# Supplementary material for: New Insights into Xanthophylls and Lipidomic Profile Changes Induced by Glucose Supplementation in the Marine Diatom Nitzschia laevis
Source: Mar Drugs. 2022 Jul 14;20(7):456. doi: 10.3390/md20070456 (PMC9318829; doi:10.3390/md20070456)
Supplement: Supplementary file 1 [file marinedrugs-20-00456-s001.zip › Supplementary file 1.xlsx]

## Sheet: Iden_Quant
Compound ID	Fold change (MC/AC)	t.test_p.value	RT	LipidIon	LipidGroup	Adduct	Class	FattyAcid	FA1	FA2	FA3	CalcMz	IonFormula	Grade	MainIon1 (fragment ions used for lipid quantification)	Area[AC-1]	Area[AC-2]	Area[AC-3]	Area[MC-1]	Area[MC-2]	Area[MC-3]
10.37_768.707979333333	0.847036	0.301949	10.37	TG(16:0/14:0/14:0)	TG(44:0)	M+NH4	TG	(16:0/14:0/14:0)	(16:0)	(14:0)	(14:0)	768.708	C47 H94 O6 N1	A	M+NH4	1.53051e+07	1.29432e+07	1.51716e+07	1.28858e+07	9.38733e+06	1.45051e+07
10.05_766.691824666667	0.745514	0.482879	10.05	TG(16:1/14:0/14:0)	TG(44:1)	M+NH4	TG	(16:1/14:0/14:0)	(16:1)	(14:0)	(14:0)	766.692	C47 H92 O6 N1	A	M+NH4	1.01898e+08	1.23836e+08	5.54778e+07	2.44301e+07	8.92263e+07	9.59909e+07
10.52_782.723609	1.13476	0.790518	10.52	TG(15:0/14:0/16:0)	TG(45:0)	M+NH4	TG	(15:0/14:0/16:0)	(15:0)	(14:0)	(16:0)	782.723	C48 H96 O6 N1	A	M+NH4	5.5242e+06	4.65319e+06	8.91122e+06	1.10823e+07	4.5158e+06	6.06281e+06
10.67_796.739320666667	0.967674	0.762134	10.67	TG(16:0/14:0/16:0)	TG(46:0)	M+NH4	TG	(16:0/14:0/16:0)	(16:0)	(14:0)	(16:0)	796.739	C49 H98 O6 N1	A	M+NH4	2.99054e+07	2.72606e+07	3.12796e+07	2.80489e+07	2.01234e+07	3.74142e+07
10.81_810.754878833333	1.10405	0.739416	10.81	TG(15:0/16:0/16:0)	TG(47:0)	M+NH4	TG	(15:0/16:0/16:0)	(15:0)	(16:0)	(16:0)	810.755	C50 H100 O6 N1	A	M+NH4	5.54051e+06	4.67755e+06	1.3263e+07	1.30111e+07	5.59375e+06	7.31937e+06
10.95_824.770899333333	0.981949	0.796017	10.95	TG(16:0/16:0/16:0)	TG(48:0)	M+NH4	TG	(16:0/16:0/16:0)	(16:0)	(16:0)	(16:0)	824.77	C51 H102 O6 N1	A	M+NH4	2.9939e+07	2.93409e+07	2.95897e+07	3.00904e+07	1.81239e+07	3.90512e+07
11.22_852.801318833333	1.07506	0.999752	11.22	TG(18:0/16:0/16:0)	TG(50:0)	M+NH4	TG	(18:0/16:0/16:0)	(18:0)	(16:0)	(16:0)	852.801	C53 H106 O6 N1	A	M+NH4	3.78501e+06	3.78638e+06	8.69039e+06	1.06293e+07	3.25415e+06	3.59904e+06
10.21_780.707920333333	0.96421	0.801753	10.21	TG(15:0/14:0/16:1)	TG(45:1)	M+NH4	TG	(15:0/14:0/16:1)	(15:0)	(14:0)	(16:1)	780.708	C48 H94 O6 N1	A	M+NH4	1.81387e+07	1.96502e+07	1.14182e+07	7.67492e+06	1.88516e+07	2.09195e+07
10.37_794.72377	1.03897	0.869713	10.37	TG(16:0/14:0/16:1)	TG(46:1)	M+NH4	TG	(16:0/14:0/16:1)	(16:0)	(14:0)	(16:1)	794.723	C49 H96 O6 N1	A	M+NH4	4.97981e+08	4.91778e+08	2.8868e+08	1.62842e+08	5.45314e+08	6.2011e+08
10.52_808.7395445	1.43652	0.714663	10.52	TG(15:0/16:0/16:1)	TG(47:1)	M+NH4	TG	(15:0/16:0/16:1)	(15:0)	(16:0)	(16:1)	808.739	C50 H98 O6 N1	A	M+NH4	6.14711e+07	6.34715e+07	3.36724e+07	2.41004e+07	9.40691e+07	1.09683e+08
10.67_822.7557305	1.46618	0.639994	10.67	TG(16:0/16:0/16:1)	TG(48:1)	M+NH4	TG	(16:0/16:0/16:1)	(16:0)	(16:0)	(16:1)	822.755	C51 H100 O6 N1	A	M+NH4	8.73379e+08	861570349	609238021	4.12169e+08	1529014449	1495825755
10.95_850.786324166667	1.59889	0.608547	10.95	TG(18:0/16:0/16:1)	TG(50:1)	M+NH4	TG	(18:0/16:0/16:1)	(18:0)	(16:0)	(16:1)	850.786	C53 H104 O6 N1	A	M+NH4	63843227	7.55694e+07	5.30781e+07	3.5111e+07	1.74431e+08	9.82297e+07
10.55_860.770397333333	1.24389	0.686548	10.55	TG(19:1/16:1/16:1)	TG(51:3)	M+NH4	TG	(19:1/16:1/16:1)	(19:1)	(16:1)	(16:1)	860.77	C54 H102 O6 N1	A	M+NH4	4.58319e+06	5.46515e+06	3.49768e+06	2.78617e+06	7.19279e+06	6.87082e+06
10.06_792.708005833333	0.983785	0.804304	10.06	TG(16:0/14:0/16:2)	TG(46:2)	M+NH4	TG	(16:0/14:0/16:2)	(16:0)	(14:0)	(16:2)	792.708	C49 H94 O6 N1	A	M+NH4	5.03421e+08	6.04851e+08	276470144	1.49964e+08	6.1837e+08	5.93955e+08
10.21_806.723391666667	1.22608	0.9303	10.21	TG(15:0/16:0/16:2)	TG(47:2)	M+NH4	TG	(15:0/16:0/16:2)	(15:0)	(16:0)	(16:2)	806.723	C50 H96 O6 N1	A	M+NH4	6.9343e+07	7.76742e+07	3.54242e+07	2.20575e+07	1.02693e+08	98936666
10.37_820.739374166667	1.32009	0.800649	10.37	TG(16:0/16:0/16:2)	TG(48:2)	M+NH4	TG	(16:0/16:0/16:2)	(16:0)	(16:0)	(16:2)	820.739	C51 H98 O6 N1	A	M+NH4	1793170436	1825818893	1069025722	7.01372e+08	2865182638	2622040637
10_804.708072333333	0.871102	0.687066	10	TG(15:0/16:1/16:2)	TG(47:3)	M+NH4	TG	(15:0/16:1/16:2)	(15:0)	(16:1)	(16:2)	804.708	C50 H94 O6 N1	A	M+NH4	3.10843e+07	3.96092e+07	1.40078e+07	7.03643e+06	2.9278e+07	3.7469e+07
10.07_818.724332	1.06859	0.917578	10.07	TG(16:0/16:1/16:2)	TG(48:3)	M+NH4	TG	(16:0/16:1/16:2)	(16:0)	(16:1)	(16:2)	818.723	C51 H96 O6 N1	A	M+NH4	1402828202	1330431458	6.01029e+08	3.63307e+08	1519119998	1680557580
10.81_836.770470166667	1.52522	0.15529	10.81	TG(16:0/16:1/17:0)	TG(49:1)	M+NH4	TG	(16:0/16:1/17:0)	(16:0)	(16:1)	(17:0)	836.77	C52 H102 O6 N1	A	M+NH4	1.4022e+07	1.63685e+07	1.27044e+07	1.464e+07	2.53664e+07	2.5723e+07
10.52_834.755301833333	1.42882	0.837083	10.52	TG(16:1/16:1/17:0)	TG(49:2)	M+NH4	TG	(16:1/16:1/17:0)	(16:1)	(16:1)	(17:0)	834.755	C52 H100 O6 N1	A	M+NH4	3.12708e+07	3.92578e+07	2.13825e+07	1.09398e+07	6.34396e+07	5.69446e+07
10.24_832.739366666667	1.16908	0.745507	10.24	TG(16:0/16:1/17:2)	TG(49:3)	M+NH4	TG	(16:0/16:1/17:2)	(16:0)	(16:1)	(17:2)	832.739	C52 H98 O6 N1	A	M+NH4	2.76184e+07	4.38067e+07	3.10785e+07	2.19981e+07	4.38035e+07	5.4033e+07
10.01_830.723726833333	0.677673	0.405609	10.01	TG(16:1/16:1/17:2)	TG(49:4)	M+NH4	TG	(16:1/16:1/17:2)	(16:1)	(16:1)	(17:2)	830.723	C52 H96 O6 N1	A	M+NH4	1.84945e+07	2.18759e+07	9.39537e+06	3.93703e+06	1.47394e+07	1.50485e+07
11.47_880.832784333333	1.27313	0.822429	11.47	TG(18:0/16:0/18:0)	TG(52:0)	M+NH4	TG	(18:0/16:0/18:0)	(18:0)	(16:0)	(18:0)	880.833	C55 H110 O6 N1	A	M+NH4	1.46111e+06	1.2642e+06	4.68674e+06	6.52469e+06	1.4857e+06	1.42612e+06
11.21_878.816957333333	1.22355	0.310319	11.21	TG(18:0/16:0/18:1)	TG(52:1)	M+NH4	TG	(18:0/16:0/18:1)	(18:0)	(16:0)	(18:1)	878.817	C55 H108 O6 N1	A	M+NH4	4.59561e+06	6.02568e+06	6.6931e+06	5.97902e+06	8.94362e+06	6.2623e+06
10.64_848.770688166667	1.35568	0.784996	10.64	TG(16:0/16:1/18:1)	TG(50:2)	M+NH4	TG	(16:0/16:1/18:1)	(16:0)	(16:1)	(18:1)	848.77	C53 H102 O6 N1	A	M+NH4	1.97448e+08	2.32918e+08	1.46128e+08	8.85182e+07	3.94934e+08	2.98088e+08
11.08_864.801488166667	1.01332	0.970482	11.08	TG(16:0/17:0/18:1)	TG(51:1)	M+NH4	TG	(16:0/17:0/18:1)	(16:0)	(17:0)	(18:1)	864.801	C54 H106 O6 N1	A	M+NH4	2.44309e+06	2.49504e+06	2.60457e+06	2.46135e+06	1.97891e+06	3.20288e+06
10.81_862.785957166667	1.14913	0.825367	10.81	TG(16:1/17:0/18:1)	TG(51:2)	M+NH4	TG	(16:1/17:0/18:1)	(16:1)	(17:0)	(18:1)	862.786	C54 H104 O6 N1	A	M+NH4	4.23189e+06	5.06385e+06	4.72824e+06	2.87748e+06	7.1187e+06	6.11915e+06
10.95_876.801826166667	1.01821	0.803415	10.95	TG(16:0/18:1/18:1)	TG(52:2)	M+NH4	TG	(16:0/18:1/18:1)	(16:0)	(18:1)	(18:1)	876.801	C55 H106 O6 N1	A	M+NH4	2.36943e+07	3.36809e+07	6.18024e+07	4.84537e+07	4.09412e+07	3.19524e+07
11.21_904.832939833333	1.01923	0.868725	11.21	TG(18:0/18:1/18:1)	TG(54:2)	M+NH4	TG	(18:0/18:1/18:1)	(18:0)	(18:1)	(18:1)	904.833	C57 H110 O6 N1	A	M+NH4	3.90897e+06	5.62546e+06	7.45502e+06	7.18068e+06	5.06836e+06	5.06713e+06
10.95_902.817511	0.957349	0.9567	10.95	TG(18:1/18:1/18:1)	TG(54:3)	M+NH4	TG	(18:1/18:1/18:1)	(18:1)	(18:1)	(18:1)	902.817	C57 H108 O6 N1	A	M+NH4	9.67499e+06	1.34257e+07	2.91706e+07	2.40652e+07	1.34292e+07	1.25474e+07
10.69_874.786294666667	0.927187	0.98903	10.69	TG(16:0/18:1/18:2)	TG(52:3)	M+NH4	TG	(16:0/18:1/18:2)	(16:0)	(18:1)	(18:2)	874.786	C55 H104 O6 N1	A	M+NH4	4.2767e+07	4.66671e+07	1.01851e+08	6.6692e+07	6.26893e+07	4.79754e+07
10.67_900.8014455	1.17146	0.953592	10.67	TG(18:1/18:1/18:2)	TG(54:4)	M+NH4	TG	(18:1/18:1/18:2)	(18:1)	(18:1)	(18:2)	900.801	C57 H106 O6 N1	A	M+NH4	2.03507e+07	1.95925e+07	5.02257e+06	2.77486e+06	2.1925e+07	2.79756e+07
10.31_898.785951	0.983348	0.764922	10.31	TG(18:1/18:2/18:2)	TG(54:5)	M+NH4	TG	(18:1/18:2/18:2)	(18:1)	(18:2)	(18:2)	898.786	C57 H104 O6 N1	A	M+NH4	4.68223e+07	45951861	2.23284e+07	1.04343e+07	4.33433e+07	5.94083e+07
10.38_846.755027166667	1.15305	0.974755	10.38	TG(16:0/16:0/18:3)	TG(50:3)	M+NH4	TG	(16:0/16:0/18:3)	(16:0)	(16:0)	(18:3)	846.755	C53 H100 O6 N1	A	M+NH4	2.8724e+08	3.06563e+08	1.65983e+08	8.95288e+07	4.07215e+08	3.79327e+08
10_842.723738333333	1.0279	0.701489	10	TG(16:1/16:1/18:3)	TG(50:5)	M+NH4	TG	(16:1/16:1/18:3)	(16:1)	(16:1)	(18:3)	842.723	C53 H96 O6 N1	A	M+NH4	3.79833e+08	1.28085e+08	1.28386e+08	1.54154e+07	2.98187e+08	3.40454e+08
10.44_858.754758166667	0.919239	0.667507	10.44	TG(16:0/16:0/19:4)	TG(51:4)	M+NH4	TG	(16:0/16:0/19:4)	(16:0)	(16:0)	(19:4)	858.755	C54 H100 O6 N1	A	M+NH4	1.04944e+07	1.26736e+07	6.27717e+06	2.26057e+06	1.18988e+07	1.29077e+07
10.44_872.77067	0.60252	0.358058	10.44	TG(16:0/16:1/20:3)	TG(52:4)	M+NH4	TG	(16:0/16:1/20:3)	(16:0)	(16:1)	(20:3)	872.77	C55 H102 O6 N1	A	M+NH4	1.73963e+08	6.38635e+07	6.22874e+07	3.59789e+07	7.52293e+07	6.96164e+07
10.2_870.754395833333	0.871856	0.726189	10.2	TG(16:1/16:1/20:3)	TG(52:5)	M+NH4	TG	(16:1/16:1/20:3)	(16:1)	(16:1)	(20:3)	870.755	C55 H100 O6 N1	A	M+NH4	1.01899e+08	2.62911e+08	109557967	4.67902e+07	1.78662e+08	1.88128e+08
10.17_856.739233	0.831533	0.594271	10.17	TG(15:0/16:1/20:4)	TG(51:5)	M+NH4	TG	(15:0/16:1/20:4)	(15:0)	(16:1)	(20:4)	856.739	C54 H98 O6 N1	A	M+NH4	1.6714e+07	2.15653e+07	9.20133e+06	3.4075e+06	1.85246e+07	1.75496e+07
10.08_868.739352833333	0.841105	0.606877	10.08	TG(16:1/16:1/20:4)	TG(52:6)	M+NH4	TG	(16:1/16:1/20:4)	(16:1)	(16:1)	(20:4)	868.739	C55 H98 O6 N1	A	M+NH4	5.58763e+08	6.45326e+08	3.06215e+08	153234524	5.62325e+08	5.54765e+08
10.25_920.770655333333	0.916999	0.708516	10.25	TG(16:0/20:4/20:4)	TG(56:8)	M+NH4	TG	(16:0/20:4/20:4)	(16:0)	(20:4)	(20:4)	920.77	C59 H102 O6 N1	A	M+NH4	1.54502e+07	2.01143e+07	9.20053e+06	4.50808e+06	1.90462e+07	1.74952e+07
10.21_882.754553333333	0.853814	0.617898	10.21	TG(16:0/17:1/20:5)	TG(53:6)	M+NH4	TG	(16:0/17:1/20:5)	(16:0)	(17:1)	(20:5)	882.755	C56 H100 O6 N1	A	M+NH4	9.17449e+06	1.18138e+07	5.43153e+06	2.33333e+06	1.02797e+07	9.94451e+06
10.14_894.754781333333	0.577686	0.391088	10.14	TG(16:1/18:1/20:5)	TG(54:7)	M+NH4	TG	(16:1/18:1/20:5)	(16:1)	(18:1)	(20:5)	894.755	C57 H100 O6 N1	A	M+NH4	1.37287e+08	1.66544e+08	3.39718e+07	1.75235e+07	1.51437e+08	2.6183e+07
10.02_944.7702605	0.937488	0.723055	10.02	TG(18:1/20:4/20:5)	TG(58:10)	M+NH4	TG	(18:1/20:4/20:5)	(18:1)	(20:4)	(20:5)	944.77	C61 H102 O6 N1	A	M+NH4	9.54443e+06	9.34604e+06	4.19952e+06	1.84774e+06	1.02955e+07	9.5033e+06
10.1_896.770320666667	1.23303	0.570206	10.1	TG(16:0/16:1/22:5)	TG(54:6)	M+NH4	TG	(16:0/16:1/22:5)	(16:0)	(16:1)	(22:5)	896.77	C57 H102 O6 N1	A	M+NH4	6.1704e+07	7.32376e+07	8.69825e+07	5.532e+07	9.39911e+07	1.24329e+08
11.71_934.879704666667	1.20978	0.601129	11.71	TG(16:0/16:1/24:0)	TG(56:1)	M+NH4	TG	(16:0/16:1/24:0)	(16:0)	(16:1)	(24:0)	934.88	C59 H116 O6 N1	A	M+NH4	1.19312e+06	1.40286e+06	1.02985e+06	873569	1.8282e+06	1.68466e+06
11.46_932.863897166667	1.02962	0.846423	11.46	TG(16:1/16:1/24:0)	TG(56:2)	M+NH4	TG	(16:1/16:1/24:0)	(16:1)	(16:1)	(24:0)	932.864	C59 H114 O6 N1	A	M+NH4	4.14233e+06	5.40911e+06	2.89566e+06	1.48566e+06	5.59525e+06	5.73483e+06
11.2_930.848293	0.864845	0.582895	11.2	TG(16:1/16:1/24:1)	TG(56:3)	M+NH4	TG	(16:1/16:1/24:1)	(16:1)	(16:1)	(24:1)	930.848	C59 H112 O6 N1	A	M+NH4	3.20657e+06	4.49418e+06	2.70383e+06	1.6571e+06	3.57973e+06	3.76153e+06
3.14_737.452454	0.871364	0.388109	3.14	SQDG(14:0/14:0)	SQDG(28:0)	M-H	SQDG	(14:0/14:0)	(14:0)	(14:0)	NA	737.452	C37 H69 O12 S1	A	NA	1.86735e+07	1.88313e+07	2.51197e+07	2.22004e+07	1.58493e+07	1.6519e+07
4.31_693.471952166667	1.62101	0.0144638	4.31	PG(16:0/14:0)	PG(30:0)	M-H	PG	(16:0/14:0)	(16:0)	(14:0)	NA	693.471	C36 H70 O10 N0 P1	B	M+NH4	3.05374e+06	2.879e+06	2875721	4.23627e+06	4.67072e+06	5.37158e+06
8.08_558.509242	1.42136	0.416019	8.08	DG(16:0/14:0)	DG(30:0)	M+NH4	DG	(16:0/14:0)	(16:0)	(14:0)	NA	558.509	C33 H68 O5 N1	B	M+NH4	3.12539e+06	3.10992e+06	2.33375e+06	2.16225e+06	4.72385e+06	5.29359e+06
3.53_691.456196833333	1.77452	0.0144944	3.53	PG(16:1/14:0)	PG(30:1)	M-H	PG	(16:1/14:0)	(16:1)	(14:0)	NA	691.456	C36 H68 O10 N0 P1	B	M+NH4	8.09541e+06	6.59037e+06	9.12987e+06	1.52532e+07	1.36597e+07	1.33484e+07
4.53_748.5142895	0.83277	0.279757	4.53	PC(16:1/14:0)	PC(30:1)	M+HCOO	PC	(16:1/14:0)	(16:1)	(14:0)	NA	748.513	C39 H75 O10 N1 P1	A	M+H	2.36454e+07	1.95809e+07	2.68534e+07	2.42672e+07	1.66199e+07	1.74731e+07
4.58_704.523146666667	0.852342	0.237932	4.58	PC(30:1)	PC(30:1)	M+H	PC	(16:1/14:0)	(16:1)	(14:0)	NA	704.522	C38 H75 O8 N1 P1	C	M+H	4.44528e+08	4.08343e+08	3.25374e+08	311385101	352302712	3.4058e+08
3.89_746.4987865	0.971053	0.76441	3.89	PC(16:2/14:0)	PC(30:2)	M+HCOO	PC	(16:2/14:0)	(16:2)	(14:0)	NA	746.498	C39 H73 O10 N1 P1	A	M+H	6.43502e+06	5.40416e+06	5.55949e+06	8.18761e+06	3.94303e+06	4.76439e+06
3.95_702.507154	1.13071	0.64546	3.95	PC(30:2)	PC(30:2)	M+H	PC	(16:2/14:0)	(16:2)	(14:0)	NA	702.507	C38 H73 O8 N1 P1	C	M+H	1.76719e+08	163768438	1.12233e+08	1.18541e+08	1.78568e+08	2.14785e+08
6.71_747.527251	1.6508	0.0791094	6.71	MGDG(14:0/16:0)	MGDG(30:0)	M+HCOO	MGDG	(14:0/16:0)	(14:0)	(16:0)	NA	747.526	C40 H75 O12	A	NA	2.83805e+06	4.44776e+06	2.52763e+06	4.96373e+06	6.78613e+06	4.45017e+06
4.91_793.514835	0.643745	0.0634463	4.91	SQDG(16:0/16:0)	SQDG(32:0)	M-H	SQDG	(16:0/16:0)	(16:0)	(16:0)	NA	793.514	C41 H77 O12 S1	A	NA	6.70038e+07	5.55406e+07	8.65124e+07	4.24973e+07	4.22793e+07	4.98026e+07
5.47_721.5032735	1.92168	0.0337212	5.47	PG(16:0/16:0)	PG(32:0)	M-H	PG	(16:0/16:0)	(16:0)	(16:0)	NA	721.503	C38 H74 O10 N0 P1	B	M+NH4	4.27205e+06	4.11211e+06	4.0129e+06	7.40954e+06	9.91e+06	6.50364e+06
7.95_775.5582675	1.50308	0.0171012	7.95	MGDG(16:0/16:0)	MGDG(32:0)	M+HCOO	MGDG	(16:0/16:0)	(16:0)	(16:0)	NA	775.558	C42 H79 O12	B	NA	1.19502e+07	1.09207e+07	1.41498e+07	1.84783e+07	1.98405e+07	1.73262e+07
8.51_586.540981333333	1.45669	0.372784	8.51	DG(16:0/16:0)	DG(32:0)	M+NH4	DG	(16:0/16:0)	(16:0)	(16:0)	NA	586.541	C35 H72 O5 N1	B	M+NH4	1.56627e+07	1.55899e+07	9.45233e+06	1.06092e+07	2.35539e+07	2.51314e+07
4.98_733.5032035	1.15156	0.046253	4.98	PG(17:1/16:0)	PG(33:1)	M-H	PG	(17:1/16:0)	(17:1)	(16:0)	NA	733.503	C39 H74 O10 N0 P1	B	M+NH4	3.81103e+06	3.66286e+06	3.81269e+06	4.36283e+06	4.05124e+06	4.58315e+06
8.33_598.540744833333	0.778475	0.489216	8.33	DG(17:1/16:0)	DG(33:1)	M+NH4	DG	(17:1/16:0)	(17:1)	(16:0)	NA	598.541	C36 H72 O5 N1	B	M+NH4	7.09823e+06	7.94763e+06	4.05846e+06	2.23316e+06	6.29081e+06	6.34826e+06
8.91_614.571909166667	1.30881	0.105627	8.91	DG(18:0/16:0)	DG(34:0)	M+NH4	DG	(18:0/16:0)	(18:0)	(16:0)	NA	614.572	C37 H76 O5 N1	B	M+NH4	2.99221e+06	2.32515e+06	3.00577e+06	3.01915e+06	3.68165e+06	4.19264e+06
3.59_741.4713515	0.846878	0.0142654	3.59	PG(18:4/16:0)	PG(34:4)	M-H	PG	(18:4/16:0)	(18:4)	(16:0)	NA	741.471	C40 H70 O10 N0 P1	B	M+NH4	3.11065e+06	3.43617e+06	3.30001e+06	2.82745e+06	2.63101e+06	2.8806e+06
7.65_538.519481666667	1.05803	0.193598	7.65	Cer(d18:1/16:0)	Cer(d34:1)	M+H	Cer	(d18:1/16:0)	(d18:1)	(16:0)	NA	538.519	C34 H68 O3 N1	B	M+H	2.09014e+06	2.29805e+06	2.10414e+06	2.24158e+06	2.34391e+06	2.28355e+06
4.49_907.564927833333	1.33679	0.0826619	4.49	DGDG(14:0/16:1)	DGDG(30:1)	M+HCOO	DGDG	(14:0/16:1)	(14:0)	(16:1)	NA	907.564	C46 H83 O17	A	NA	3.28121e+07	3.03915e+07	3.94192e+07	5.48218e+07	4.16155e+07	4.07477e+07
5.37_745.511831833333	1.50879	0.00243745	5.37	MGDG(14:0/16:1)	MGDG(30:1)	M+HCOO	MGDG	(14:0/16:1)	(14:0)	(16:1)	NA	745.511	C40 H73 O12	A	NA	9.1933e+07	8.38456e+07	8.73171e+07	1.42921e+08	1.30404e+08	1.23632e+08
3.94_705.471380333333	1.28543	0.437522	3.94	PG(15:0/16:1)	PG(31:1)	M-H	PG	(15:0/16:1)	(15:0)	(16:1)	NA	705.471	C37 H70 O10 N0 P1	B	M+NH4	2.09426e+06	1.73382e+06	3.26247e+06	4.35467e+06	2.17431e+06	2.58541e+06
5.08_921.580446	1.10293	0.00637275	5.08	DGDG(15:0/16:1)	DGDG(31:1)	M+HCOO	DGDG	(15:0/16:1)	(15:0)	(16:1)	NA	921.579	C47 H85 O17	A	NA	4.91305e+06	4.90081e+06	4.73221e+06	5.49359e+06	5.3035e+06	5.24615e+06
5.14_762.529339833333	0.736418	0.0340895	5.14	PC(15:0/16:1)	PC(31:1)	M+HCOO	PC	(15:0/16:1)	(15:0)	(16:1)	NA	762.529	C40 H77 O10 N1 P1	A	M+H	2.93909e+06	2.61169e+06	2.67424e+06	2.26486e+06	1.75734e+06	2.03485e+06
5.2_718.538416333333	0.731465	0.104132	5.2	PC(31:1)	PC(31:1)	M+H	PC	(15:0/16:1)	(15:0)	(16:1)	NA	718.538	C39 H77 O8 N1 P1	C	M+H	4.41116e+07	4.04566e+07	3.10216e+07	2.80417e+07	2.81846e+07	2.83235e+07
6.09_759.527322333333	1.21892	0.0027203	6.09	MGDG(15:0/16:1)	MGDG(31:1)	M+HCOO	MGDG	(15:0/16:1)	(15:0)	(16:1)	NA	759.526	C41 H75 O12	A	NA	1.66081e+07	1.61198e+07	1.54146e+07	2.02837e+07	1.95089e+07	1.88889e+07
7.9_570.509448166667	0.802385	0.460007	7.9	DG(15:0/16:1)	DG(31:1)	M+NH4	DG	(15:0/16:1)	(15:0)	(16:1)	NA	570.509	C34 H68 O5 N1	B	M+NH4	1.14248e+07	1.53847e+07	9.31852e+06	5.07414e+06	1.15085e+07	1.2406e+07
3.85_719.4871625	0.656476	0.0342873	3.85	PG(16:0/16:1)	PG(32:1)	M-H	PG	(16:0/16:1)	(16:0)	(16:1)	NA	719.487	C38 H72 O10 N0 P1	B	M+NH4	3.42543e+06	3.68258e+06	3.27991e+06	2.5576e+06	1.87001e+06	2.39182e+06
4.16_807.5033625	0.748782	0.086435	4.16	PI(16:0/16:1)	PI(32:1)	M-H	PI	(16:0/16:1)	(16:0)	(16:1)	NA	807.503	C41 H76 O13 N0 P1	A	M+NH4	2.79196e+06	2.24739e+06	2.57159e+06	2.31438e+06	1.71993e+06	1.66462e+06
4.52_719.487980333333	1.153	0.468368	4.52	PG(16:0/16:1)(rep)	PG(32:1)	M-H	PG	(16:0/16:1)	(16:0)	(16:1)	NA	719.487	C38 H72 O10 N0 P1	B	M+NH4	4.13361e+08	3.53508e+08	5.2549e+08	6.30368e+08	4.16957e+08	4.42771e+08
4.7_721.501834666667	1.12918	0.3769	4.7	PG(32:1)	PG(32:1)	M+H	PG	(16:0/16:1)	(16:0)	(16:1)	NA	721.501	C38 H74 O10 N0 P1	C	M+NH4	1.28076e+08	1.19458e+08	9.42975e+07	1.08698e+08	1.35215e+08	142074768
4.7_738.528802	1.11285	0.36442	4.7	PG(16:0/16:1)(rep)(rep)	PG(32:1)	M+NH4	PG	(16:0/16:1)	(16:0)	(16:1)	NA	738.528	C38 H77 O10 N1 P1	B	M+NH4	5.54331e+08	5.17522e+08	423984086	4.82536e+08	5.76753e+08	6.05348e+08
5.75_889.5900725	1.03627	0.688305	5.75	DGDG(16:0/16:1)(rep)	DGDG(32:1)	M-H	DGDG	(16:0/16:1)	(16:0)	(16:1)	NA	889.589	C47 H85 O15	A	NA	3.00627e+06	3.03441e+06	3.30472e+06	3.63811e+06	3.13759e+06	2.90863e+06
5.75_935.595965833333	1.04733	0.752685	5.75	DGDG(16:0/16:1)	DGDG(32:1)	M+HCOO	DGDG	(16:0/16:1)	(16:0)	(16:1)	NA	935.595	C48 H87 O17	A	NA	9.99871e+07	1.04716e+08	1.23494e+08	1.3767e+08	106888952	9.91706e+07
5.83_776.545537333333	1.08758	0.615018	5.83	PC(16:0/16:1)	PC(32:1)	M+HCOO	PC	(16:0/16:1)	(16:0)	(16:1)	NA	776.545	C41 H79 O10 N1 P1	A	M+H	2.36648e+07	2.07046e+07	2.74527e+07	3.21837e+07	2.37408e+07	2.21875e+07
5.87_645.450416166667	1.43951	0.0110034	5.87	PA(16:0/16:1)	PA(32:1)	M-H	PA	(16:0/16:1)	(16:0)	(16:1)	NA	645.45	C35 H66 O8 N0 P1	A	M-H	2.21414e+06	1.97398e+06	2.17972e+06	3.31243e+06	3.1408e+06	2.71336e+06
5.9_732.554722333333	1.02702	0.880656	5.9	PC(32:1)	PC(32:1)	M+H	PC	(16:0/16:1)	(16:0)	(16:1)	NA	732.554	C40 H79 O8 N1 P1	C	M+H	3.79177e+08	3.64418e+08	3.49336e+08	3.11059e+08	4.39795e+08	371604390
6.89_773.543009333333	1.17811	0.40183	6.89	MGDG(16:0/16:1)	MGDG(32:1)	M+HCOO	MGDG	(16:0/16:1)	(16:0)	(16:1)	NA	773.542	C42 H77 O12	A	NA	3.67559e+08	3.33771e+08	4.94153e+08	5.92047e+08	4.231e+08	3.93263e+08
6.9_727.536275	1.29045	0.272593	6.9	MGDG(16:0/16:1)(rep)	MGDG(32:1)	M-H	MGDG	(16:0/16:1)	(16:0)	(16:1)	NA	727.537	C41 H75 O10	B	NA	1.72031e+06	1.51087e+06	2.61562e+06	3.1774e+06	2.2191e+06	2.14852e+06
8.12_584.5255985	0.749992	0.344821	8.12	DG(16:0/16:1)	DG(32:1)	M+NH4	DG	(16:0/16:1)	(16:0)	(16:1)	NA	584.525	C35 H70 O5 N1	B	M+NH4	1150925638	1049873822	8.72012e+08	3.98876e+08	9.49427e+08	9.5628e+08
3.38_789.483202166667	1.27784	0.79591	3.38	SQDG(16:1/16:1)	SQDG(32:2)	M-H	SQDG	(16:1/16:1)	(16:1)	(16:1)	NA	789.483	C41 H73 O12 S1	A	NA	4.79148e+07	2.68698e+08	7.63018e+07	9.3547e+07	3.52939e+08	5.55969e+07
3.66_717.471927666667	1.20849	0.114015	3.66	PG(16:1/16:1)(rep)	PG(32:2)	M-H	PG	(16:1/16:1)	(16:1)	(16:1)	NA	717.471	C38 H70 O10 N0 P1	B	M+NH4	2.6984e+07	2.46188e+07	3.21049e+07	3.65435e+07	3.23398e+07	3.22764e+07
3.76_736.512920666667	2.06604	0.340823	3.76	PG(16:1/16:1)	PG(32:2)	M+NH4	PG	(16:1/16:1)	(16:1)	(16:1)	NA	736.512	C38 H75 O10 N1 P1	A	M+NH4	489008	2.35954e+07	2.08628e+07	2.3759e+07	4.16268e+07	2.74769e+07
4.63_887.573876166667	0.91001	0.606583	4.63	DGDG(16:1/16:1)(rep)	DGDG(32:2)	M-H	DGDG	(16:1/16:1)	(16:1)	(16:1)	NA	887.574	C47 H83 O15	A	NA	3.43761e+06	2.92809e+06	4.20596e+06	4.33033e+06	2.82257e+06	2.46742e+06
4.63_933.5805415	0.89948	0.602274	4.63	DGDG(16:1/16:1)	DGDG(32:2)	M+HCOO	DGDG	(16:1/16:1)	(16:1)	(16:1)	NA	933.579	C48 H85 O17	A	NA	1.1067e+08	9.92531e+07	1.49088e+08	1.46696e+08	9.63218e+07	7.99051e+07
4.72_643.434843833333	0.836547	0.525358	4.72	PA(16:1/16:1)	PA(32:2)	M-H	PA	(16:1/16:1)	(16:1)	(16:1)	NA	643.434	C35 H64 O8 N0 P1	A	M-H	2.76188e+06	2.32784e+06	4.11401e+06	3.73307e+06	2.36287e+06	1.60341e+06
4.74_771.526512166667	1.22724	0.257495	4.74	MGDG(16:1/16:1)	MGDG(32:2)	M+HCOO	MGDG	(16:1/16:1)	(16:1)	(16:1)	NA	771.526	C42 H75 O12	B	NA	2.03201e+07	1.80066e+07	2.38929e+07	2.54423e+07	30703150	20213194
7.6_582.50985	0.879752	0.644062	7.6	DG(16:1/16:1)	DG(32:2)	M+NH4	DG	(16:1/16:1)	(16:1)	(16:1)	NA	582.509	C35 H68 O5 N1	B	M+NH4	1.9813e+08	2.13078e+08	1.09368e+08	5.11015e+07	2.16098e+08	1.90779e+08
5.63_744.554389333333	1.10352	0.638328	5.63	PC(17:1/16:1)	PC(33:2)	M+H	PC	(17:1/16:1)	(17:1)	(16:1)	NA	744.554	C41 H79 O8 N1 P1	B	M+H	7.87299e+08	8.17476e+08	5.17295e+08	6.40461e+08	993981702	7.07299e+08
3.78_905.5485705	1.22733	0.136725	3.78	DGDG(14:0/16:2)	DGDG(30:2)	M+HCOO	DGDG	(14:0/16:2)	(14:0)	(16:2)	NA	905.548	C46 H81 O17	A	NA	1.84006e+06	1.81045e+06	2.01706e+06	2.49962e+06	1.93518e+06	2.52116e+06
4.48_743.496156166667	1.64662	0.0445701	4.48	MGDG(14:0/16:2)	MGDG(30:2)	M+HCOO	MGDG	(14:0/16:2)	(14:0)	(16:2)	NA	743.495	C40 H71 O12	A	NA	1.59179e+07	1.51413e+07	2.03601e+07	3.58382e+07	2.30947e+07	2.57355e+07
5.06_757.511682333333	1.33142	0.0138398	5.06	MGDG(15:0/16:2)	MGDG(31:2)	M+HCOO	MGDG	(15:0/16:2)	(15:0)	(16:2)	NA	757.511	C41 H73 O12	A	NA	4.72046e+06	5.20227e+06	4.4326e+06	6.7509e+06	5.75866e+06	6.60341e+06
4.68_774.5297055	0.796389	0.470931	4.68	PC(16:0/16:2)	PC(32:2)	M+HCOO	PC	(16:0/16:2)	(16:0)	(16:2)	NA	774.529	C41 H77 O10 N1 P1	A	M+H	3.98904e+07	2.97079e+07	5.91209e+07	5.02041e+07	2.91011e+07	2.32054e+07
4.73_730.538771833333	0.672395	0.0532695	4.73	PC(32:2)	PC(32:2)	M+H	PC	(16:0/16:2)	(16:0)	(16:2)	NA	730.538	C40 H77 O8 N1 P1	C	M+H	1344519081	1107506820	9.30549e+08	8.17612e+08	7.44847e+08	7.11966e+08
5.52_771.527184666667	1.18752	0.400949	5.52	MGDG(16:0/16:2)	MGDG(32:2)	M+HCOO	MGDG	(16:0/16:2)	(16:0)	(16:2)	NA	771.526	C42 H75 O12	A	NA	4.50301e+08	3.75316e+08	4.8676e+08	6.71065e+08	4.67705e+08	4.19697e+08
3.89_931.564601333333	0.886743	0.595336	3.89	DGDG(16:1/16:2)	DGDG(32:3)	M+HCOO	DGDG	(16:1/16:2)	(16:1)	(16:2)	NA	931.564	C48 H83 O17	A	NA	2.00371e+07	1.6715e+07	2.7138e+07	2.63833e+07	1.40466e+07	1.62241e+07
4.06_769.510874833333	0.72276	0.352521	4.06	MGDG(16:1/16:2)	MGDG(32:3)	M+HCOO	MGDG	(16:1/16:2)	(16:1)	(16:2)	NA	769.511	C42 H73 O12	A	NA	1.24838e+07	1.72174e+07	2.46755e+07	2.14381e+07	9.24237e+06	8.62072e+06
4.06_772.514440833333	0.790737	0.47048	4.06	PC(16:1/16:2)	PC(32:3)	M+HCOO	PC	(16:1/16:2)	(16:1)	(16:2)	NA	772.513	C41 H75 O10 N1 P1	A	M+H	2.35172e+07	2.79106e+07	4.58862e+07	3.77718e+07	1.60834e+07	2.30945e+07
4.09_728.523187333333	0.658348	0.20181	4.09	PC(32:3)	PC(32:3)	M+H	PC	(16:1/16:2)	(16:1)	(16:2)	NA	728.522	C40 H75 O8 N1 P1	C	M+H	7.73803e+08	1061262540	5.55408e+08	4.28666e+08	3.86449e+08	7.58648e+08
4.6_769.511607833333	1.5472	0.122912	4.6	MGDG(16:1/16:2)(rep)	MGDG(32:3)	M+HCOO	MGDG	(16:1/16:2)	(16:1)	(16:2)	NA	769.511	C42 H73 O12	A	NA	2.31415e+08	2.15412e+08	3.16677e+08	5.37623e+08	3.28672e+08	3.15001e+08
2.59_785.452516666667	0.793728	0.852987	2.59	SQDG(16:2/16:2)	SQDG(32:4)	M-H	SQDG	(16:2/16:2)	(16:2)	(16:2)	NA	785.452	C41 H69 O12 S1	A	NA	2.13125e+07	2.53457e+06	2.49729e+07	1.21586e+07	1.30118e+07	1.35794e+07
3.3_929.548031833333	1.19303	0.311345	3.3	DGDG(16:2/16:2)	DGDG(32:4)	M+HCOO	DGDG	(16:2/16:2)	(16:2)	(16:2)	NA	929.548	C48 H81 O17	A	NA	1.06949e+06	1.14138e+06	1.35251e+06	1.52941e+06	1.10011e+06	1.62169e+06
3.54_770.498329833333	0.657007	0.370118	3.54	PC(16:2/16:2)	PC(32:4)	M+HCOO	PC	(16:2/16:2)	(16:2)	(16:2)	NA	770.498	C41 H73 O10 N1 P1	A	M+H	8.41635e+06	1.67045e+07	2.38164e+07	1.53086e+07	8.06265e+06	8.78083e+06
3.57_726.507138666667	0.582871	0.0255374	3.57	PC(32:4)	PC(32:4)	M+H	PC	(16:2/16:2)	(16:2)	(16:2)	NA	726.507	C40 H73 O8 N1 P1	C	M+H	4.9296e+08	4.71683e+08	3.38697e+08	2.39681e+08	2.24788e+08	2.9521e+08
3.92_741.479945333333	1.0361	0.978261	3.92	MGDG(14:0/16:3)	MGDG(30:3)	M+HCOO	MGDG	(14:0/16:3)	(14:0)	(16:3)	NA	741.479	C40 H69 O12	B	NA	5.76123e+06	5.08295e+06	8.47865e+06	9.85992e+06	4.92572e+06	5.2347e+06
3.86_767.496282333333	1.97883	0.0247544	3.86	MGDG(16:1/16:3)	MGDG(32:4)	M+HCOO	MGDG	(16:1/16:3)	(16:1)	(16:3)	NA	767.495	C42 H71 O12	A	NA	4.21762e+07	3.91293e+07	4.91692e+07	1.0312e+08	6.45976e+07	9.04702e+07
3.43_765.480115333333	0.69169	0.569182	3.43	MGDG(16:2/16:3)	MGDG(32:5)	M+HCOO	MGDG	(16:2/16:3)	(16:2)	(16:3)	NA	765.479	C42 H69 O12	A	NA	1.54578e+08	4.09519e+07	7.54384e+07	7.48913e+07	3.1986e+07	8.05488e+07
3_763.464560833333	0.366842	0.00752879	3	MGDG(16:3/16:3)	MGDG(32:6)	M+HCOO	MGDG	(16:3/16:3)	(16:3)	(16:3)	NA	763.464	C42 H67 O12	A	NA	3.02164e+07	2.21058e+07	3.07663e+07	1.33679e+07	9.03556e+06	8.0769e+06
7.58_760.585895833333	1.77217	0.0840805	7.58	PC(17:1/17:0)	PC(34:1)	M+H	PC	(17:1/17:0)	(17:1)	(17:0)	NA	760.585	C42 H83 O8 N1 P1	A	M+H	3.64966e+07	3.46796e+07	5.53153e+07	8.03307e+07	9.38897e+07	4.9944e+07
7.75_787.558258	0.972221	0.342694	7.75	MGDG(16:0/17:1)	MGDG(33:1)	M+HCOO	MGDG	(16:0/17:1)	(16:0)	(17:1)	NA	787.558	C43 H79 O12	B	NA	2.70948e+06	2.69034e+06	2.53002e+06	2.56283e+06	2.62796e+06	2.51876e+06
6.24_785.5428855	1.0368	0.565182	6.24	MGDG(16:1/17:1)	MGDG(33:2)	M+HCOO	MGDG	(16:1/17:1)	(16:1)	(17:1)	NA	785.542	C43 H77 O12	B	NA	2.14951e+06	2.22187e+06	1.93531e+06	2.07092e+06	2.3562e+06	2.11166e+06
5.19_783.526807833333	1.24642	0.0508213	5.19	MGDG(16:2/17:1)	MGDG(33:3)	M+HCOO	MGDG	(16:2/17:1)	(16:2)	(17:1)	NA	783.526	C43 H75 O12	B	NA	1.34e+06	1.33474e+06	1.1094e+06	1.4408e+06	1.58198e+06	1.69386e+06
6.07_758.570903166667	0.896672	0.753271	6.07	PC(17:1/17:1)	PC(34:2)	M+H	PC	(17:1/17:1)	(17:1)	(17:1)	NA	758.569	C42 H81 O8 N1 P1	A	M+H	2.80542e+08	2.36326e+08	1.41226e+08	1.5984e+08	2.27374e+08	2.0288e+08
4.55_716.523086166667	1.36206	0.490443	4.55	PC(14:0/17:2)	PC(31:2)	M+H	PC	(14:0/17:2)	(14:0)	(17:2)	NA	716.522	C39 H75 O8 N1 P1	B	M+H	4.56446e+07	3.31616e+07	2.16674e+07	2.56467e+07	4.20691e+07	6.91351e+07
8.33_803.589191666667	2.13035	0.0127197	8.33	MGDG(16:0/18:0)	MGDG(34:0)	M+HCOO	MGDG	(16:0/18:0)	(16:0)	(18:0)	NA	803.589	C44 H83 O12	B	NA	380974	388890	395149	763406	978469	740015
7.97_801.574137166667	1.78282	0.00540325	7.97	MGDG(16:1/18:0)	MGDG(34:1)	M+HCOO	MGDG	(16:1/18:0)	(16:1)	(18:0)	NA	801.573	C44 H81 O12	A	NA	4.49066e+06	4.26671e+06	5.52916e+06	8.4951e+06	9.45302e+06	7.52219e+06
5.78_747.519078333333	2.28215	0.26502	5.78	PG(16:0/18:1)	PG(34:1)	M-H	PG	(16:0/18:1)	(16:0)	(18:1)	NA	747.518	C40 H76 O10 N0 P1	B	M+NH4	5.39313e+06	4.89505e+06	391388	8.3587e+06	8.05455e+06	7.95912e+06
6_766.5592515	1.27404	0.591281	6	PG(34:1)	PG(34:1)	M+NH4	PG	(16:0/18:1)	(16:0)	(18:1)	NA	766.559	C40 H81 O10 N1 P1	C	M+NH4	1.26993e+07	1.26445e+07	6.34768e+06	7.02237e+06	1.73158e+07	1.60378e+07
8.54_612.556495	1.26729	0.794808	8.54	DG(16:0/18:1)	DG(34:1)	M+NH4	DG	(16:0/18:1)	(16:0)	(18:1)	NA	612.556	C37 H74 O5 N1	B	M+NH4	1.1871e+07	1.41322e+07	8.49269e+06	5.77771e+06	2.08094e+07	1.71291e+07
7.01_799.558409166667	1.48349	0.0525852	7.01	MGDG(16:1/18:1)	MGDG(34:2)	M+HCOO	MGDG	(16:1/18:1)	(16:1)	(18:1)	NA	799.558	C44 H79 O12	B	NA	8.01484e+06	6.88151e+06	1.00483e+07	1.25972e+07	1.41438e+07	1.02641e+07
5.83_797.5429425	1.37183	0.00138609	5.83	MGDG(16:2/18:1)	MGDG(34:3)	M+HCOO	MGDG	(16:2/18:1)	(16:2)	(18:1)	NA	797.542	C44 H77 O12	A	NA	1.3042e+07	1.42052e+07	1.3039e+07	1.90367e+07	1.77977e+07	1.84314e+07
5.07_795.5272915	0.709483	0.344032	5.07	MGDG(16:3/18:1)	MGDG(34:4)	M+HCOO	MGDG	(16:3/18:1)	(16:3)	(18:1)	NA	795.526	C44 H75 O12	A	NA	3.94594e+07	5.1105e+07	3.63239e+07	3.32346e+07	4.37651e+07	1.30253e+07
8.15_610.540822	1.16997	0.780733	8.15	DG(16:0/18:2)	DG(34:2)	M+NH4	DG	(16:0/18:2)	(16:0)	(18:2)	NA	610.541	C37 H72 O5 N1	B	M+NH4	2.60077e+07	2.84219e+07	1.84761e+07	1.49194e+07	3.86108e+07	3.17674e+07
4.94_800.545429333333	1.07785	0.574255	4.94	PC(16:1/18:2)	PC(34:3)	M+HCOO	PC	(16:1/18:2)	(16:1)	(18:2)	NA	800.545	C43 H79 O10 N1 P1	A	M+H	7.35991e+06	5.38989e+06	7.37053e+06	7.94202e+06	7.56545e+06	6.17919e+06
5_756.554179	1.00489	0.974468	5	PC(34:3)	PC(34:3)	M+H	PC	(16:1/18:2)	(16:1)	(18:2)	NA	756.554	C42 H79 O8 N1 P1	C	M+H	1.2456e+08	1.11628e+08	9.65258e+07	102972679	1.29935e+08	1.01434e+08
7.79_830.5929435	1.02741	0.910735	7.79	PC(18:0/18:2)	PC(36:2)	M+HCOO	PC	(18:0/18:2)	(18:0)	(18:2)	NA	830.592	C45 H85 O10 N1 P1	A	M+H	2.16746e+06	2.11403e+06	6.09096e+06	7.07407e+06	1.75145e+06	1.83129e+06
7.82_786.600857333333	0.999017	0.941557	7.82	PC(36:2)	PC(36:2)	M+H	PC	(18:0/18:2)	(18:0)	(18:2)	NA	786.601	C44 H85 O8 N1 P1	C	M+H	3.30209e+07	2.48699e+07	5.40366e+07	5.92657e+07	2.74652e+07	2.50865e+07
6.45_797.5423955	1.05798	0.890935	6.45	MGDG(16:0/18:3)	MGDG(34:3)	M+HCOO	MGDG	(16:0/18:3)	(16:0)	(18:3)	NA	797.542	C44 H77 O12	B	NA	3.90176e+06	4.07089e+06	3.43759e+06	2.75108e+06	4.98106e+06	4.33971e+06
7.81_608.5249975	1.1404	0.932603	7.81	DG(16:0/18:3)	DG(34:3)	M+NH4	DG	(16:0/18:3)	(16:0)	(18:3)	NA	608.525	C37 H70 O5 N1	B	M+NH4	8.75445e+06	1.01649e+07	6.69957e+06	4.26022e+06	1.27631e+07	1.21926e+07
4.34_798.529987	0.623511	0.0443685	4.34	PC(16:1/18:3)	PC(34:4)	M+HCOO	PC	(16:1/18:3)	(16:1)	(18:3)	NA	798.529	C43 H77 O10 N1 P1	A	M+H	3.09105e+07	2.64321e+07	2.37853e+07	2.14997e+07	1.44845e+07	1.46e+07
4.37_754.538703333333	0.652257	0.303128	4.37	PC(34:4)	PC(34:4)	M+H	PC	(16:1/18:3)	(16:1)	(18:3)	NA	754.538	C42 H77 O8 N1 P1	C	M+H	5.17659e+08	4.9151e+08	2.27665e+08	2.6804e+08	2.81518e+08	257176105
4.01_791.495361666667	1.11971	0.787986	4.01	MGDG(16:3/18:3)	MGDG(34:6)	M+HCOO	MGDG	(16:3/18:3)	(16:3)	(18:3)	NA	791.495	C44 H71 O12	B	NA	1718765596	1453400412	2801681367	3406498165	1645949200	1636504203
3.7_955.564519333333	0.553681	0.00556964	3.7	DGDG(16:1/18:4)	DGDG(34:5)	M+HCOO	DGDG	(16:1/18:4)	(16:1)	(18:4)	NA	955.564	C50 H83 O17	A	NA	4.17933e+06	4.19033e+06	4.82124e+06	2.75737e+06	2.4432e+06	2.10298e+06
4.37_793.511719666667	0.631982	0.0218056	4.37	MGDG(16:1/18:4)	MGDG(34:5)	M+HCOO	MGDG	(16:1/18:4)	(16:1)	(18:4)	NA	793.511	C44 H73 O12	A	NA	4.85371e+07	4.28509e+07	5.91214e+07	3.51919e+07	2.95134e+07	3.0414e+07
3.17_953.549075833333	0.61209	0.0164067	3.17	DGDG(16:2/18:4)	DGDG(34:6)	M+HCOO	DGDG	(16:2/18:4)	(16:2)	(18:4)	NA	953.548	C50 H81 O17	A	NA	5.34757e+06	5.70624e+06	7.2694e+06	4.22287e+06	3.67355e+06	3.31903e+06
3.43_791.496001833333	1.01958	0.89826	3.43	MGDG(16:2/18:4)	MGDG(34:6)	M+HCOO	MGDG	(16:2/18:4)	(16:2)	(18:4)	NA	791.495	C44 H71 O12	A	NA	4.21321e+07	3.56279e+07	5.92594e+07	7.54056e+07	3.06378e+07	3.36588e+07
3.29_789.480465166667	1.59531	0.115952	3.29	MGDG(16:3/18:4)	MGDG(34:7)	M+HCOO	MGDG	(16:3/18:4)	(16:3)	(18:4)	NA	789.479	C44 H69 O12	A	NA	4.43742e+07	3.20204e+07	5.17532e+07	9.3547e+07	5.5291e+07	5.55969e+07
4.3_766.538427666667	0.734199	0.0634558	4.3	PC(16:2/19:3)	PC(35:5)	M+H	PC	(16:2/19:3)	(16:2)	(19:3)	NA	766.538	C43 H77 O8 N1 P1	B	M+H	5.70803e+07	5.7884e+07	6.36632e+07	3.60035e+07	4.84971e+07	4.66475e+07
4.9_807.526776166667	0.671113	0.0540991	4.9	MGDG(16:1/19:4)	MGDG(35:5)	M+HCOO	MGDG	(16:1/19:4)	(16:1)	(19:4)	NA	807.526	C45 H75 O12	B	NA	2.71501e+06	2.1667e+06	2.19553e+06	1.24962e+06	1.87315e+06	1.62685e+06
3.74_764.52301	0.458528	0.0893621	3.74	PC(16:2/19:4)	PC(35:6)	M+H	PC	(16:2/19:4)	(16:2)	(19:4)	NA	764.522	C43 H75 O8 N1 P1	B	M+H	9.80582e+07	7.73396e+07	4.09782e+07	2.5832e+07	3.45094e+07	3.88729e+07
4.11_805.511168166667	0.712182	0.0176611	4.11	MGDG(16:2/19:4)	MGDG(35:6)	M+HCOO	MGDG	(16:2/19:4)	(16:2)	(19:4)	NA	805.511	C45 H73 O12	B	NA	2.64366e+06	2.64959e+06	3.21312e+06	2.17018e+06	1.91666e+06	1.97124e+06
3.61_803.495706166667	0.474525	0.00432672	3.61	MGDG(16:3/19:4)	MGDG(35:7)	M+HCOO	MGDG	(16:3/19:4)	(16:3)	(19:4)	NA	803.495	C45 H71 O12	B	NA	5.25399e+06	5.34499e+06	7.02605e+06	3.25598e+06	2.65209e+06	2.45544e+06
4.6_769.503398666667	1.52945	0.122468	4.6	PG(16:0/20:4)	PG(36:4)	M-H	PG	(16:0/20:4)	(16:0)	(20:4)	NA	769.503	C42 H74 O10 N0 P1	B	M+NH4	1.84309e+08	1.71658e+08	2.43138e+08	4.13987e+08	2.59293e+08	2.4302e+08
5.32_782.5695355	0.889781	0.770234	5.32	PC(36:4)	PC(36:4)	M+H	PC	(16:0/20:4)	(16:0)	(20:4)	NA	782.569	C44 H81 O8 N1 P1	C	M+H	1.28494e+07	5.79277e+06	1.14952e+07	8.52089e+06	1.22053e+07	6.08946e+06
5.35_826.56058	1.60864	0.22591	5.35	PC(16:0/20:4)	PC(36:4)	M+HCOO	PC	(16:0/20:4)	(16:0)	(20:4)	NA	826.56	C45 H81 O10 N1 P1	A	M+H	694712	1.07897e+06	485360	729789	1.63985e+06	1.26435e+06
5.86_826.561059166667	1.50795	0.11238	5.86	PC(16:0/20:4)(rep)	PC(36:4)	M+HCOO	PC	(16:0/20:4)	(16:0)	(20:4)	NA	826.56	C45 H81 O10 N1 P1	A	M+H	8.56827e+06	6.57732e+06	8.91186e+06	1.45813e+07	1.30143e+07	8.6818e+06
5.9_782.569990333333	1.48743	0.131449	5.9	PC(36:4)(rep)	PC(36:4)	M+H	PC	(16:0/20:4)	(16:0)	(20:4)	NA	782.569	C44 H81 O8 N1 P1	C	M+H	1.29947e+08	1.26119e+08	1.3291e+08	1.51881e+08	2.52426e+08	1.74268e+08
6.83_823.5585835	1.12935	0.379973	6.83	MGDG(16:0/20:4)	MGDG(36:4)	M+HCOO	MGDG	(16:0/20:4)	(16:0)	(20:4)	NA	823.558	C46 H79 O12	A	NA	1.62303e+07	1.63356e+07	2.0096e+07	2.02019e+07	2.28082e+07	1.64638e+07
8.1_634.540723833333	1.1167	0.975963	8.1	DG(16:0/20:4)	DG(36:4)	M+NH4	DG	(16:0/20:4)	(16:0)	(20:4)	NA	634.541	C39 H72 O5 N1	B	M+NH4	2.87186e+07	3.00427e+07	2.23524e+07	1.34679e+07	3.97318e+07	3.73797e+07
4.65_983.595632	0.721168	0.195529	4.65	DGDG(16:1/20:4)	DGDG(36:5)	M+HCOO	DGDG	(16:1/20:4)	(16:1)	(20:4)	NA	983.595	C52 H87 O17	A	NA	1.38599e+07	1.422e+07	20037331	1.45664e+07	1.21573e+07	7.97691e+06
4.73_824.545517	1.00758	0.965565	4.73	PC(16:1/20:4)	PC(36:5)	M+HCOO	PC	(16:1/20:4)	(16:1)	(20:4)	NA	824.545	C45 H79 O10 N1 P1	A	M+H	1.70648e+07	1.61474e+07	2.60384e+07	2.70078e+07	1.96489e+07	1.30433e+07
4.77_780.554486833333	0.737351	0.0864556	4.77	PC(36:5)	PC(36:5)	M+H	PC	(16:1/20:4)	(16:1)	(20:4)	NA	780.554	C44 H79 O8 N1 P1	C	M+H	7.59918e+08	7.33317e+08	5.73016e+08	4.43267e+08	6.14984e+08	4.65302e+08
4.93_821.5422384	3.15039	0.218256	4.93	MGDG(16:1/20:4)	MGDG(36:5)	M+HCOO	MGDG	(16:1/20:4)	(16:1)	(20:4)	NA	821.542	C46 H77 O12	B	NA	2.86333e+06	2.74169e+06	4.42234e+06	4.68337e+06	4.84514e+06	2.20615e+07
5.54_821.5430585	0.935693	0.630898	5.54	MGDG(16:1/20:4)(rep)	MGDG(36:5)	M+HCOO	MGDG	(16:1/20:4)	(16:1)	(20:4)	NA	821.542	C46 H77 O12	A	NA	4.31217e+07	4.15424e+07	5.10322e+07	4.68328e+07	4.83065e+07	3.18308e+07
7.67_632.525031166667	1.09251	0.959574	7.67	DG(16:1/20:4)	DG(36:5)	M+NH4	DG	(16:1/20:4)	(16:1)	(20:4)	NA	632.525	C39 H70 O5 N1	B	M+NH4	2.01376e+07	2.28868e+07	1.13873e+07	7.16657e+06	2.8837e+07	2.34416e+07
3.92_981.580133333333	0.758804	0.299431	3.92	DGDG(16:2/20:4)	DGDG(36:6)	M+HCOO	DGDG	(16:2/20:4)	(16:2)	(20:4)	NA	981.579	C52 H85 O17	A	NA	6.8667e+07	6.98412e+07	1.10081e+08	8.71712e+07	5.28391e+07	4.86202e+07
4.65_819.527307666667	0.880732	0.459032	4.65	MGDG(16:2/20:4)	MGDG(36:6)	M+HCOO	MGDG	(16:2/20:4)	(16:2)	(20:4)	NA	819.526	C46 H75 O12	A	NA	1.89311e+08	1.95422e+08	2.53133e+08	2.3524e+08	1.80096e+08	1.46453e+08
5.99_852.576505666667	1.6456	0.0693981	5.99	PC(18:1/20:4)	PC(38:5)	M+HCOO	PC	(18:1/20:4)	(18:1)	(20:4)	NA	852.576	C47 H83 O10 N1 P1	A	M+H	2.29054e+06	2.1945e+06	2.78373e+06	4.70731e+06	4.37493e+06	2.87926e+06
6.07_808.585351666667	1.58939	0.0979335	6.07	PC(38:5)	PC(38:5)	M+H	PC	(18:1/20:4)	(18:1)	(20:4)	NA	808.585	C46 H83 O8 N1 P1	C	M+H	5.13546e+07	5.31737e+07	3.67815e+07	5.91045e+07	100715873	6.47762e+07
4.24_848.545369166667	2.01028	0.190655	4.24	PC(18:3/20:4)	PC(38:7)	M+HCOO	PC	(18:3/20:4)	(18:3)	(20:4)	NA	848.545	C47 H79 O10 N1 P1	A	M+H	2.6448e+06	3.33692e+06	3.27238e+06	1.00349e+07	5.1682e+06	3.40019e+06
4.38_804.5542465	1.46774	0.168271	4.38	PC(38:7)	PC(38:7)	M+H	PC	(18:3/20:4)	(18:3)	(20:4)	NA	804.554	C46 H79 O8 N1 P1	C	M+H	1.53764e+08	1.58163e+08	1.477e+08	2.2467e+08	2.88867e+08	1.61077e+08
4.35_843.526847	0.491612	0.322537	4.35	MGDG(18:4/20:4)	MGDG(38:8)	M+HCOO	MGDG	(18:4/20:4)	(18:4)	(20:4)	NA	843.526	C48 H75 O12	A	NA	1.16279e+07	3.04084e+06	1.46879e+07	1.01978e+07	2.18541e+06	2.04882e+06
4.74_874.560576166667	1.48973	0.157062	4.74	PC(20:4/20:4)	PC(40:8)	M+HCOO	PC	(20:4/20:4)	(20:4)	(20:4)	NA	874.56	C49 H81 O10 N1 P1	A	M+H	2.46732e+06	2.70592e+06	3.71662e+06	5.06622e+06	5.16532e+06	3.012e+06
4.79_830.569735833333	1.35682	0.266145	4.79	PC(40:8)	PC(40:8)	M+H	PC	(20:4/20:4)	(20:4)	(20:4)	NA	830.569	C48 H81 O8 N1 P1	C	M+H	8.63017e+07	1.03725e+08	7.37326e+07	9.34941e+07	1.65513e+08	9.88689e+07
5.49_871.557813	0.650436	0.0381466	5.49	MGDG(20:4/20:4)	MGDG(40:8)	M+HCOO	MGDG	(20:4/20:4)	(20:4)	(20:4)	NA	871.558	C50 H79 O12	B	NA	2.20173e+06	2.18329e+06	2.75348e+06	1.74261e+06	1.67529e+06	1.22523e+06
4.04_872.5453645	1.46579	0.27804	4.04	PC(20:5/20:4)	PC(40:9)	M+HCOO	PC	(20:5/20:4)	(20:5)	(20:4)	NA	872.545	C49 H79 O10 N1 P1	A	M+H	2.41159e+06	3.58749e+06	6.12854e+06	8.19756e+06	5.17751e+06	4.40147e+06
4.08_828.554283833333	1.21812	0.266714	4.08	PC(40:9)	PC(40:9)	M+H	PC	(20:5/20:4)	(20:5)	(20:4)	NA	828.554	C48 H79 O8 N1 P1	C	M+H	1.82452e+08	2.06648e+08	1.61282e+08	183192018	2.76326e+08	2.10917e+08
4.24_784.492461666667	1.30008	0.233681	4.24	PE(20:5/20:4)(rep)	PE(40:9)	M-H	PE	(20:5/20:4)	(20:5)	(20:4)	NA	784.492	C45 H71 O8 N1 P1	A	M+H	3.14181e+06	3.60304e+06	4.5196e+06	4.90457e+06	6.05032e+06	3.68977e+06
4.29_786.5068215	0.880327	0.44193	4.29	PE(20:5/20:4)	PE(40:9)	M+H	PE	(20:5/20:4)	(20:5)	(20:4)	NA	786.507	C45 H73 O8 N1 P1	A	M+H	1.31339e+07	1.41942e+07	1.55329e+07	1.62229e+07	1.20275e+07	9.48128e+06
3.76_796.514234	0.759529	0.014862	3.76	PC(14:0/20:5)	PC(34:5)	M+HCOO	PC	(14:0/20:5)	(14:0)	(20:5)	NA	796.513	C43 H75 O10 N1 P1	A	M+H	2.03338e+07	1.77478e+07	2.01904e+07	1.60333e+07	1.34895e+07	1.47366e+07
3.83_752.523159666667	0.727323	0.0737903	3.83	PC(34:5)	PC(34:5)	M+H	PC	(14:0/20:5)	(14:0)	(20:5)	NA	752.522	C42 H75 O8 N1 P1	C	M+H	3.5186e+08	3.39085e+08	259052963	1.92722e+08	2.3747e+08	2.60763e+08
3.88_767.487682	1.85012	0.00180767	3.88	PG(16:0/20:5)	PG(36:5)	M-H	PG	(16:0/20:5)	(16:0)	(20:5)	NA	767.487	C42 H72 O10 N0 P1	B	M+NH4	3.96743e+07	3.53088e+07	4.18329e+07	8.02508e+07	6.48075e+07	7.10658e+07
3.92_786.528156166667	1.77347	0.911071	3.92	PG(16:0/20:5)(rep)	PG(36:5)	M+NH4	PG	(16:0/20:5)	(16:0)	(20:5)	NA	786.528	C42 H77 O10 N1 P1	B	M+NH4	1.80258e+07	5.36706e+06	4.29822e+06	3.35512e+06	4.16225e+06	4.1592e+07
3.66_784.513164166667	0.770384	0.0573772	3.66	PG(16:1/20:5)	PG(36:6)	M+NH4	PG	(16:1/20:5)	(16:1)	(20:5)	NA	784.512	C42 H75 O10 N1 P1	B	M+NH4	5.12947e+07	5.43709e+07	4.24113e+07	3.57605e+07	4.04155e+07	3.79001e+07
4.02_822.5294555	0.998409	0.857116	4.02	PC(16:1/20:5)	PC(36:6)	M+HCOO	PC	(16:1/20:5)	(16:1)	(20:5)	NA	822.529	C45 H77 O10 N1 P1	A	M+H	3.21736e+07	1.49656e+07	4.13575e+07	3.70235e+07	2.75735e+07	2.37589e+07
4.07_778.538886666667	0.84544	0.155666	4.07	PC(36:6)	PC(36:6)	M+H	PC	(16:1/20:5)	(16:1)	(20:5)	NA	778.538	C44 H77 O8 N1 P1	C	M+H	9.24764e+08	8.72546e+08	7.18114e+08	648407812	715235143	7.62997e+08
4.2_734.476946166667	0.575229	0.00704928	4.2	PE(16:1/20:5)	PE(36:6)	M-H	PE	(16:1/20:5)	(16:1)	(20:5)	NA	734.477	C41 H69 O8 N1 P1	A	M+H	4.42296e+06	4.17095e+06	5.1723e+06	3.08581e+06	2.36856e+06	2.46435e+06
3.35_933.559143	1.00986	0.935318	3.35	DGDG(16:2/20:5)(rep)	DGDG(36:7)	M-H	DGDG	(16:2/20:5)	(16:2)	(20:5)	NA	933.558	C51 H81 O15	A	NA	2.13571e+06	2.27323e+06	3.88925e+06	4.40475e+06	1.85849e+06	2.11679e+06
3.35_979.564357666667	0.816973	0.499978	3.35	DGDG(16:2/20:5)	DGDG(36:7)	M+HCOO	DGDG	(16:2/20:5)	(16:2)	(20:5)	NA	979.564	C52 H83 O17	A	NA	8.50689e+07	8.88333e+07	1.55427e+08	1.24627e+08	7.4228e+07	7.01982e+07
3.51_820.513772666667	0.833975	0.451921	3.51	PC(16:2/20:5)	PC(36:7)	M+HCOO	PC	(16:2/20:5)	(16:2)	(20:5)	NA	820.513	C45 H75 O10 N1 P1	A	M+H	1.60334e+07	1.38892e+07	2.27894e+07	1.95825e+07	1.07946e+07	1.35835e+07
3.53_776.523299	0.67598	0.0207574	3.53	PC(36:7)	PC(36:7)	M+H	PC	(16:2/20:5)	(16:2)	(20:5)	NA	776.522	C44 H75 O8 N1 P1	C	M+H	4.16548e+08	4.33072e+08	3.36159e+08	2.54637e+08	2.42964e+08	303962424
3.65_817.511707333333	5.36009	0.200606	3.65	MGDG(16:2/20:5)	MGDG(36:7)	M+HCOO	MGDG	(16:2/20:5)	(16:2)	(20:5)	NA	817.511	C46 H73 O12	A	NA	2.40403e+07	1.78071e+07	1.07449e+07	2.21957e+08	2.4871e+07	3.50712e+07
2.99_977.548163833333	0.446088	0.000938328	2.99	DGDG(16:3/20:5)	DGDG(36:8)	M+HCOO	DGDG	(16:3/20:5)	(16:3)	(20:5)	NA	977.548	C52 H81 O17	A	NA	2.29142e+06	1.93901e+06	2.43439e+06	941840	1.10808e+06	923168
3.44_815.496018666667	0.450342	0.0622067	3.44	MGDG(16:3/20:5)	MGDG(36:8)	M+HCOO	MGDG	(16:3/20:5)	(16:3)	(20:5)	NA	815.495	C46 H71 O12	A	NA	272095461	2.51337e+08	4.1007e+08	2.17613e+08	109735683	9.30466e+07
3.03_813.480373833333	0.662695	0.0171756	3.03	MGDG(16:4/20:5)	MGDG(36:9)	M+HCOO	MGDG	(16:4/20:5)	(16:4)	(20:5)	NA	813.479	C46 H69 O12	A	NA	9.01528e+06	7.9136e+06	9.97617e+06	5.81314e+06	5.7891e+06	6.22761e+06
4.93_850.560990833333	1.5217	0.00386071	4.93	PC(18:1/20:5)	PC(38:6)	M+HCOO	PC	(18:1/20:5)	(18:1)	(20:5)	NA	850.56	C47 H81 O10 N1 P1	A	M+H	5.15305e+06	5.27822e+06	6.08463e+06	9.00094e+06	8.43369e+06	7.69753e+06
4.99_806.5698045	1.26709	0.308892	4.99	PC(38:6)	PC(38:6)	M+H	PC	(18:1/20:5)	(18:1)	(20:5)	NA	806.569	C46 H81 O8 N1 P1	C	M+H	8.27594e+07	9.21599e+07	8.02729e+07	8.87964e+07	1.43942e+08	9.06131e+07
5.88_847.5578465	0.808746	0.0708457	5.88	MGDG(18:1/20:5)	MGDG(38:6)	M+HCOO	MGDG	(18:1/20:5)	(18:1)	(20:5)	NA	847.558	C48 H79 O12	B	NA	2.80642e+06	2.78235e+06	2.81119e+06	2.44873e+06	2.34182e+06	2.00289e+06
3.78_846.530143	0.880677	0.63152	3.78	PC(18:3/20:5)	PC(38:8)	M+HCOO	PC	(18:3/20:5)	(18:3)	(20:5)	NA	846.529	C47 H77 O10 N1 P1	A	M+H	7.1996e+06	7.00262e+06	1.19656e+07	1.11325e+07	5.89821e+06	6.01467e+06
3.8_802.538725166667	0.959226	0.886404	3.8	PC(38:8)	PC(38:8)	M+H	PC	(18:3/20:5)	(18:3)	(20:5)	NA	802.538	C46 H77 O8 N1 P1	C	M+H	177207662	1.89449e+08	1.16077e+08	1.29416e+08	1.77029e+08	1.56605e+08
4.17_715.434898166667	1.05313	0.97736	4.17	PA(18:3/20:5)	PA(38:8)	M-H	PA	(18:3/20:5)	(18:3)	(20:5)	NA	715.434	C41 H64 O8 N0 P1	B	M-H	3.9725e+06	3.11127e+06	4.60052e+06	5.91191e+06	2.26495e+06	4.12822e+06
3.73_841.511390666667	0.940769	0.924291	3.73	MGDG(18:4/20:5)	MGDG(38:9)	M+HCOO	MGDG	(18:4/20:5)	(18:4)	(20:5)	NA	841.511	C48 H73 O12	B	NA	1.68558e+06	5.52347e+06	5.32105e+06	3.44388e+06	3.16913e+06	5.17492e+06
4.67_869.5426415	0.856803	0.37002	4.67	MGDG(20:4/20:5)	MGDG(40:9)	M+HCOO	MGDG	(20:4/20:5)	(20:4)	(20:5)	NA	869.542	C50 H77 O12	A	NA	4.41988e+06	4.57253e+06	6.21541e+06	5.12199e+06	4.36883e+06	3.53928e+06
3.63_782.477079833333	0.856209	0.504926	3.63	PE(20:5/20:5)	PE(40:10)	M-H	PE	(20:5/20:5)	(20:5)	(20:5)	NA	782.477	C45 H69 O8 N1 P1	A	M+H	4.4796e+06	4.70091e+06	6.9238e+06	6.39518e+06	3.41904e+06	3.97444e+06
3.66_784.4913265	0.778422	0.0898092	3.66	PE(20:5/20:5)(rep)	PE(40:10)	M+H	PE	(20:5/20:5)	(20:5)	(20:5)	NA	784.491	C45 H71 O8 N1 P1	A	M+H	1.35514e+07	1.38489e+07	1.29584e+07	1.09829e+07	8.77843e+06	1.16548e+07
7.97_658.540564833333	2.28771	0.263346	7.97	DG(16:0/22:6)	DG(38:6)	M+NH4	DG	(16:0/22:6)	(16:0)	(22:6)	NA	658.541	C41 H72 O5 N1	B	M+NH4	2.97019e+06	2.64805e+06	2.25064e+06	2.125e+06	8.33506e+06	7.54163e+06
3.8_896.545187666667	1.58163	0.0527802	3.8	PC(20:5/22:6)	PC(42:11)	M+HCOO	PC	(20:5/22:6)	(20:5)	(22:6)	NA	896.545	C51 H79 O10 N1 P1	A	M+H	1.77925e+06	1.70445e+06	2.4748e+06	3.23297e+06	3.01129e+06	3.17986e+06
3.83_852.5538655	1.34924	0.0143492	3.83	PC(42:11)	PC(42:11)	M+H	PC	(20:5/22:6)	(20:5)	(22:6)	NA	852.554	C50 H79 O8 N1 P1	C	M+H	3.40309e+07	38020560	3.2978e+07	4.26371e+07	5.14894e+07	4.75839e+07
9.53_652.660565	0.863479	0.268227	9.53	Cer(d18:0/24:0)	Cer(d42:0)	M+H	Cer	(d18:0/24:0)	(d18:0)	(24:0)	NA	652.66	C42 H86 O3 N1	A	M+H	3.30265e+07	2.57961e+07	2.44686e+07	2.36817e+07	2.28141e+07	2.54244e+07
9.4_650.64508	0.719584	0.0555279	9.4	Cer(d18:1/24:0)	Cer(d42:1)	M+H	Cer	(d18:1/24:0)	(d18:1)	(24:0)	NA	650.645	C42 H84 O3 N1	B	M+H	1.373e+08	1.31263e+08	1.06694e+08	7.77273e+07	8.53647e+07	1.06938e+08
9.05_648.6291995	0.806509	0.28564	9.05	Cer(d18:1/24:1)	Cer(d42:2)	M+H	Cer	(d18:1/24:1)	(d18:1)	(24:1)	NA	648.629	C42 H82 O3 N1	B	M+H	1.26936e+07	1.24611e+07	9.6712e+06	6.78983e+06	9.6969e+06	1.16007e+07
9.75_678.676087	0.851672	0.270215	9.75	Cer(d18:1/26:0)	Cer(d44:1)	M+H	Cer	(d18:1/26:0)	(d18:1)	(26:0)	NA	678.676	C44 H88 O3 N1	B	M+H	6.44172e+07	6.74173e+07	4.91601e+07	4.69786e+07	4.87761e+07	5.83933e+07
9.45_676.660367833333	0.875674	0.892902	9.45	Cer(d18:1/26:1)	Cer(d44:2)	M+H	Cer	(d18:1/26:1)	(d18:1)	(26:1)	NA	676.66	C44 H86 O3 N1	B	M+H	2.23977e+07	2.40443e+07	7.46771e+06	9.35554e+06	1.67796e+07	2.10722e+07
0.74_527.253303166667	0.802779	0.0521494	0.74	SQMG(14:0)	SQMG(14:0)	M-H	SQMG	(14:0)	(14:0)	NA	NA	527.253	C23 H43 O11 S1	D	NA	1.09823e+08	1.21513e+08	1.28677e+08	9.58766e+07	8.60696e+07	1.07065e+08
0.91_468.3086315	0.90705	0.458021	0.91	LPC(14:0)	LPC(14:0)	M+H	LPC	(14:0)	(14:0)	NA	NA	468.308	C22 H47 O7 N1 P1	B	M+H	1.03057e+08	9.72831e+07	1.30344e+08	1.14811e+08	9.17404e+07	9.33965e+07
1.01_509.296413666667	1.31109	0.0830887	1.01	MGMG(14:0)	MGMG(14:0)	M+HCOO	MGMG	(14:0)	(14:0)	NA	NA	509.297	C24 H45 O11	B	NA	1.25046e+07	1.20524e+07	1.38233e+07	1.97258e+07	1.44736e+07	16120555
1.16_409.236118166667	1.26238	0.0373065	1.16	LPEt(14:0)	LPEt(14:0)	M-H	LPEt	(14:0)	(14:0)	NA	NA	409.236	C19 H38 O7 N0 P1	D	NA	8.42118e+06	7.46746e+06	9.1139e+06	9.939e+06	1.07238e+07	1.08998e+07
0.95_407.220695166667	0.821922	0.287513	0.95	LPEt(14:1)	LPEt(14:1)	M-H	LPEt	(14:1)	(14:1)	NA	NA	407.22	C19 H36 O7 N0 P1	D	NA	4.6599e+07	4.52559e+07	5.68528e+07	5.34143e+07	3.33529e+07	3.54588e+07
1.16_409.236055166667	1.18594	0.0113127	1.16	LPMe(15:0)	LPMe(15:0)	M-H	LPMe	(15:0)	(15:0)	NA	NA	409.236	C19 H38 O7 N0 P1	D	NA	8.42103e+06	9.06461e+06	9.1115e+06	9.93688e+06	1.07065e+07	1.08992e+07
1.17_523.3126425	0.81758	0.162177	1.17	MGMG(15:0)	MGMG(15:0)	M+HCOO	MGMG	(15:0)	(15:0)	NA	NA	523.312	C25 H47 O11	B	NA	4.47757e+06	4.78008e+06	4.61506e+06	4.54812e+06	3.29795e+06	3.49598e+06
0.84_405.204917166667	0.866747	0.407252	0.84	LPMe(15:2)	LPMe(15:2)	M-H	LPMe	(15:2)	(15:2)	NA	NA	405.205	C19 H34 O7 N0 P1	D	NA	2.57901e+07	2.55279e+07	3.2523e+07	3.15422e+07	1.96033e+07	2.15234e+07
0.89_555.284422666667	0.585768	0.00752354	0.89	SQMG(16:0)	SQMG(16:0)	M-H	SQMG	(16:0)	(16:0)	NA	NA	555.284	C25 H47 O11 S1	D	NA	1139846872	1381464749	1491104002	8.24619e+08	6.82265e+08	8.43462e+08
0.94_483.272991	1.00022	0.983251	0.94	LPG(16:0)	LPG(16:0)	M-H	LPG	(16:0)	(16:0)	NA	NA	483.273	C22 H44 O9 N0 P1	B	NA	3.57227e+08	4.06222e+08	461406448	4.52893e+08	3.68847e+08	403382074
0.97_485.2878345	0.978576	0.722695	0.97	LPG(16:0)(rep)	LPG(16:0)	M+H	LPG	(16:0)	(16:0)	NA	NA	485.287	C22 H46 O9 N0 P1	B	NA	1.12632e+08	1.1985e+08	1.09738e+08	1.02039e+08	1.09402e+08	1.23447e+08
1.14_699.381265	0.841419	0.038851	1.14	DGMG(16:0)	DGMG(16:0)	M+HCOO	DGMG	(16:0)	(16:0)	NA	NA	699.381	C32 H59 O16	B	NA	3.03938e+07	3.09124e+07	2.92777e+07	2.57217e+07	2.34594e+07	2.70379e+07
1.15_540.331205166667	1.08857	0.58714	1.15	LPC(16:0)	LPC(16:0)	M+HCOO	LPC	(16:0)	(16:0)	NA	NA	540.331	C25 H51 O9 N1 P1	A	M+H	4.84254e+07	6.51305e+07	6.33786e+07	5.16456e+07	6.90804e+07	7.18788e+07
1.16_409.236230833333	1.2681	0.0442215	1.16	LPA(16:0)	LPA(16:0)	M-H	LPA	(16:0)	(16:0)	NA	NA	409.236	C19 H38 O7 N0 P1	A	NA	8.42106e+06	7.35482e+06	9.11375e+06	9.93913e+06	1.07237e+07	1.08997e+07
1.16_496.340091666667	1.21774	0.102786	1.16	LPC(16:0)(rep)	LPC(16:0)	M+H	LPC	(16:0)	(16:0)	NA	NA	496.34	C24 H51 O7 N1 P1	B	M+H	5.1391e+08	5.43974e+08	514799744	5.5211e+08	6.78097e+08	6.84918e+08
1.35_491.322864	0.949782	0.678185	1.35	MGMG(16:0)(rep)	MGMG(16:0)	M-H	MGMG	(16:0)	(16:0)	NA	NA	491.323	C25 H47 O9	B	NA	1.26817e+07	1.35204e+07	1.05576e+07	1.4041e+07	1.08847e+07	9.98802e+06
1.35_537.328514833333	0.937501	0.333279	1.35	MGMG(16:0)	MGMG(16:0)	M+HCOO	MGMG	(16:0)	(16:0)	NA	NA	537.328	C26 H49 O11	B	NA	3.85928e+08	4.13234e+08	4.20654e+08	4.08044e+08	3.44063e+08	3.91472e+08
0.77_553.269136166667	0.701395	0.0538843	0.77	SQMG(16:1)	SQMG(16:1)	M-H	SQMG	(16:1)	(16:1)	NA	NA	553.269	C25 H45 O11 S1	D	NA	4.3972e+07	5.03131e+07	5.87959e+07	3.34805e+07	3.08407e+07	4.30491e+07
0.79_481.257277833333	1.01371	0.674401	0.79	LPG(16:1)	LPG(16:1)	M-H	LPG	(16:1)	(16:1)	NA	NA	481.257	C22 H42 O9 N0 P1	B	NA	4.42069e+07	4.1552e+07	4.51946e+07	4.276e+07	4.4724e+07	4.5265e+07
0.93_697.365394	0.890932	0.352451	0.93	DGMG(16:1)	DGMG(16:1)	M+HCOO	DGMG	(16:1)	(16:1)	NA	NA	697.365	C32 H57 O16	B	NA	1.33002e+08	1.31745e+08	1.60214e+08	1.50355e+08	1.16346e+08	1.1191e+08
0.94_494.324416333333	0.734164	0.0930114	0.94	LPC(16:1)(rep)	LPC(16:1)	M+H	LPC	(16:1)	(16:1)	NA	NA	494.324	C24 H49 O7 N1 P1	B	M+H	2590544518	2572213514	3292716168	2535166518	1730403601	1942136829
0.94_538.3149675	0.710727	0.115217	0.94	LPC(16:1)	LPC(16:1)	M+HCOO	LPC	(16:1)	(16:1)	NA	NA	538.315	C25 H49 O9 N1 P1	A	M+H	2.57544e+08	2.50864e+08	3.18618e+08	2.53903e+08	1.57387e+08	1.76499e+08
0.95_407.220315	0.821924	0.288218	0.95	LPA(16:1)	LPA(16:1)	M-H	LPA	(16:1)	(16:1)	NA	NA	407.22	C19 H36 O7 N0 P1	A	NA	4.65993e+07	4.52559e+07	5.68528e+07	5.34456e+07	33325055	3.54561e+07
1.07_489.307261333333	0.979007	0.754941	1.07	MGMG(16:1)(rep)	MGMG(16:1)	M-H	MGMG	(16:1)	(16:1)	NA	NA	489.307	C25 H45 O9	B	NA	4.14961e+07	3.94572e+07	4.18036e+07	4.59773e+07	3.76975e+07	3.65051e+07
1.07_535.312798166667	0.976404	0.732394	1.07	MGMG(16:1)	MGMG(16:1)	M+HCOO	MGMG	(16:1)	(16:1)	NA	NA	535.312	C26 H47 O11	B	NA	1205189883	1166806432	1191278772	1336886212	1092686389	1049624978
1.23_435.251850833333	1.67927	0.0857824	1.23	LPEt(16:1)	LPEt(16:1)	M-H	LPEt	(16:1)	(16:1)	NA	NA	435.252	C21 H40 O7 N0 P1	D	NA	1.40829e+07	8.65655e+06	1.48147e+07	2.07859e+07	2.12042e+07	2.10734e+07
0.7_551.2531975	0.533574	0.018905	0.7	SQMG(16:2)	SQMG(16:2)	M-H	SQMG	(16:2)	(16:2)	NA	NA	551.253	C25 H43 O11 S1	D	NA	1.01315e+07	1.18754e+07	1.45606e+07	6.07643e+06	5.31529e+06	8.11978e+06
0.81_695.349967833333	1.01993	0.928619	0.81	DGMG(16:2)	DGMG(16:2)	M+HCOO	DGMG	(16:2)	(16:2)	NA	NA	695.35	C32 H55 O16	B	NA	3.02375e+08	2.81024e+08	3.45819e+08	3.7388e+08	2.57679e+08	3.16178e+08
0.82_649.344028166667	1.05094	0.648772	0.82	DGMG(16:2)(rep)	DGMG(16:2)	M-H	DGMG	(16:2)	(16:2)	NA	NA	649.344	C31 H53 O14	B	NA	1.97543e+07	1.54417e+07	2.0019e+07	2.07244e+07	1.6936e+07	2.03673e+07
0.84_405.204684166667	0.866718	0.407139	0.84	LPA(16:2)	LPA(16:2)	M-H	LPA	(16:2)	(16:2)	NA	NA	405.205	C19 H34 O7 N0 P1	A	NA	2.57901e+07	2.55279e+07	3.2523e+07	3.15404e+07	1.96033e+07	2.15228e+07
0.84_492.3089465	0.756723	0.207363	0.84	LPC(16:2)(rep)	LPC(16:2)	M+H	LPC	(16:2)	(16:2)	NA	NA	492.308	C24 H47 O7 N1 P1	B	M+H	1427961731	1354605240	1829326715	1526492952	869374916	1094056581
0.84_536.299277166667	0.799961	0.302468	0.84	LPC(16:2)	LPC(16:2)	M+HCOO	LPC	(16:2)	(16:2)	NA	NA	536.299	C25 H47 O9 N1 P1	A	M+H	1.38046e+08	1.33183e+08	1.81811e+08	1.60759e+08	8.89948e+07	1.12661e+08
0.92_487.291306	1.25265	0.343718	0.92	MGMG(16:2)(rep)	MGMG(16:2)	M-H	MGMG	(16:2)	(16:2)	NA	NA	487.291	C25 H43 O9	B	NA	5.64132e+07	5.94971e+07	6.87683e+07	1.01544e+08	5.79692e+07	7.18238e+07
0.92_533.2966055	1.2061	0.366907	0.92	MGMG(16:2)	MGMG(16:2)	M+HCOO	MGMG	(16:2)	(16:2)	NA	NA	533.297	C26 H45 O11	B	NA	1628172165	1754073517	2106729987	2799590465	1701637482	2119029748
0.95_433.2360945	0.910369	0.429693	0.95	LPEt(16:2)	LPEt(16:2)	M-H	LPEt	(16:2)	(16:2)	NA	NA	433.236	C21 H38 O7 N0 P1	D	NA	3.78769e+07	3.7035e+07	4.51141e+07	4.33239e+07	3.34163e+07	3.25276e+07
0.76_693.333936	0.523281	0.0483415	0.76	DGMG(16:3)	DGMG(16:3)	M+HCOO	DGMG	(16:3)	(16:3)	NA	NA	693.334	C32 H53 O16	B	NA	1.06332e+07	8.26813e+06	1.45565e+07	6.53703e+06	5.30446e+06	5.66633e+06
0.82_485.275890666667	0.603705	0.108975	0.82	MGMG(16:3)(rep)	MGMG(16:3)	M-H	MGMG	(16:3)	(16:3)	NA	NA	485.276	C25 H41 O9	B	NA	7.68433e+07	6.56216e+07	8.96537e+07	6.75084e+07	33653531	3.89694e+07
0.82_531.281224833333	0.627805	0.103405	0.82	MGMG(16:3)	MGMG(16:3)	M+HCOO	MGMG	(16:3)	(16:3)	NA	NA	531.281	C26 H43 O11	B	NA	2181937764	1862327169	2664879250	1971014215	1095546223	1145472966
1.22_435.251771333333	1.63807	0.0611259	1.22	LPMe(17:1)	LPMe(17:1)	M-H	LPMe	(17:1)	(17:1)	NA	NA	435.252	C21 H40 O7 N0 P1	D	NA	1.40832e+07	9.71988e+06	1.4815e+07	2.07955e+07	2.13511e+07	2.11127e+07
1.15_583.315787833333	0.71026	0.054922	1.15	SQMG(18:0)	SQMG(18:0)	M-H	SQMG	(18:0)	(18:0)	NA	NA	583.316	C27 H51 O11 S1	D	NA	3.48421e+06	4.03409e+06	3.89249e+06	2.66581e+06	2.25502e+06	3.1838e+06
1.57_568.362197833333	1.23268	0.376671	1.57	LPC(18:0)	LPC(18:0)	M+HCOO	LPC	(18:0)	(18:0)	NA	NA	568.362	C27 H55 O9 N1 P1	A	M+H	1.83385e+06	1.75763e+06	1.69602e+06	1.58181e+06	2.77823e+06	2.15774e+06
1.59_524.371504333333	1.30212	0.445444	1.59	LPC(18:0)(rep)	LPC(18:0)	M+H	LPC	(18:0)	(18:0)	NA	NA	524.371	C26 H55 O7 N1 P1	B	M+H	2.1732e+07	1.89224e+07	1.52047e+07	1.48773e+07	3.25533e+07	2.53044e+07
1.87_565.359648	1.17237	0.496747	1.87	MGMG(18:0)	MGMG(18:0)	M+HCOO	MGMG	(18:0)	(18:0)	NA	NA	565.359	C28 H53 O11	B	NA	1.80835e+06	2.07338e+06	1.29695e+06	1.45603e+06	2.24682e+06	2.36849e+06
1.21_566.346688833333	1.39658	0.00497743	1.21	LPC(18:1)	LPC(18:1)	M+HCOO	LPC	(18:1)	(18:1)	NA	NA	566.346	C27 H53 O9 N1 P1	A	M+H	4.97623e+07	4.80586e+07	5.17601e+07	7.36707e+07	6.43597e+07	7.08709e+07
1.22_435.251890666667	1.68978	0.0838729	1.22	LPA(18:1)	LPA(18:1)	M-H	LPA	(18:1)	(18:1)	NA	NA	435.252	C21 H40 O7 N0 P1	A	NA	1.40831e+07	8.65655e+06	1.48147e+07	2.08453e+07	2.15006e+07	2.11127e+07
1.22_522.355846	1.53435	0.000709218	1.22	LPC(18:1)(rep)	LPC(18:1)	M+H	LPC	(18:1)	(18:1)	NA	NA	522.355	C26 H53 O7 N1 P1	B	M+H	392839129	3.83918e+08	4.28105e+08	638608390	5.86581e+08	6.23496e+08
1.41_563.344249166667	0.941519	0.311556	1.41	MGMG(18:1)	MGMG(18:1)	M+HCOO	MGMG	(18:1)	(18:1)	NA	NA	563.344	C28 H51 O11	B	NA	9.96231e+06	1.02547e+07	1.14954e+07	1.01031e+07	9.74858e+06	1.00062e+07
0.95_433.236107333333	0.910415	0.429905	0.95	LPA(18:2)	LPA(18:2)	M-H	LPA	(18:2)	(18:2)	NA	NA	433.236	C21 H38 O7 N0 P1	A	NA	3.78763e+07	3.70374e+07	4.51218e+07	4.3326e+07	3.34248e+07	3.25312e+07
1.03_564.330721666667	1.30742	0.00801653	1.03	LPC(18:2)	LPC(18:2)	M+HCOO	LPC	(18:2)	(18:2)	NA	NA	564.331	C27 H51 O9 N1 P1	A	M+H	2.84187e+07	3.08194e+07	3.26229e+07	4.28136e+07	3.95595e+07	3.77278e+07
1.04_520.340040166667	1.29696	0.0153507	1.04	LPC(18:2)(rep)	LPC(18:2)	M+H	LPC	(18:2)	(18:2)	NA	NA	520.34	C26 H51 O7 N1 P1	B	M+H	2.95901e+08	3.42051e+08	3.43582e+08	4.13792e+08	4.53627e+08	4.05591e+08
1.14_561.328302166667	0.973023	0.644778	1.14	MGMG(18:2)	MGMG(18:2)	M+HCOO	MGMG	(18:2)	(18:2)	NA	NA	561.328	C28 H49 O11	B	NA	7.08077e+06	7.55059e+06	7.6418e+06	7.95931e+06	6.66782e+06	7.04516e+06
10.84_666.618545833333	0.947902	0.779141	10.84	ChE(18:2)	ChE(18:2)	M+NH4	ChE	(18:2)	(18:2)	NA	NA	666.618	C45 H80 O2 N1	B	NA	4.54268e+06	5.68604e+06	2.38371e+07	1.59547e+07	9.27023e+06	7.06621e+06
0.87_431.220312833333	1.11051	0.540266	0.87	LPA(18:3)	LPA(18:3)	M-H	LPA	(18:3)	(18:3)	NA	NA	431.22	C21 H36 O7 N0 P1	A	NA	2.24961e+07	2.67677e+07	3.19846e+07	3.71896e+07	2.60277e+07	2.70101e+07
0.9_518.3244705	1.55467	0.0147089	0.9	LPC(18:3)(rep)	LPC(18:3)	M+H	LPC	(18:3)	(18:3)	NA	NA	518.324	C26 H49 O7 N1 P1	B	M+H	3.76249e+08	4.21629e+08	4.98539e+08	7.41975e+08	6.49126e+08	6.24398e+08
0.9_562.314742	1.6055	0.0307424	0.9	LPC(18:3)	LPC(18:3)	M+HCOO	LPC	(18:3)	(18:3)	NA	NA	562.315	C27 H49 O9 N1 P1	A	M+H	3.28586e+07	3.58182e+07	4.68928e+07	7.41551e+07	5.74457e+07	5.39457e+07
1_559.3126735	1.03375	0.76944	1	MGMG(18:3)	MGMG(18:3)	M+HCOO	MGMG	(18:3)	(18:3)	NA	NA	559.312	C28 H47 O11	B	NA	1.84077e+07	1.57984e+07	1.88935e+07	2.10246e+07	1.61272e+07	1.77399e+07
0.8_516.308416833333	1.71341	0.0355842	0.8	LPC(18:4)(rep)	LPC(18:4)	M+H	LPC	(18:4)	(18:4)	NA	NA	516.308	C26 H47 O7 N1 P1	B	M+H	9.38232e+07	1.1029e+08	149672448	230008315	1.68313e+08	2.07859e+08
0.8_560.2993915	1.72592	0.00340859	0.8	LPC(18:4)	LPC(18:4)	M+HCOO	LPC	(18:4)	(18:4)	NA	NA	560.299	C27 H47 O9 N1 P1	A	M+H	9.95011e+06	1.14249e+07	1.24389e+07	2.11487e+07	1.74016e+07	1.98101e+07
1.26_275.201763833333	0.400229	0.0717507	1.26	FA(18:4)	FA(18:4)	M-H	FA	(18:4)	(18:4)	NA	NA	275.202	O2 H27 C18	D	M-H	3.70372e+08	318846069	2.70167e+08	6.54115e+07	1.38742e+08	1.7982e+08
2.28_275.201715	0.864606	0.957031	2.28	FA(18:4)(rep)	FA(18:4)	M-H	FA	(18:4)	(18:4)	NA	NA	275.202	O2 H27 C18	D	M-H	1.45821e+07	5.19149e+06	1.44331e+06	9.60512e+06	6.81206e+06	1.92711e+06
1.45_289.2173265	0.524437	0.16574	1.45	FA(19:4)	FA(19:4)	M-H	FA	(19:4)	(19:4)	NA	NA	289.217	O2 H29 C19	D	M-H	3.02727e+07	3.04312e+07	2.27096e+07	6.4083e+06	1.663e+07	2.07067e+07
1.09_546.355601	2.32444	0.0166271	1.09	LPC(20:3)(rep)	LPC(20:3)	M+H	LPC	(20:3)	(20:3)	NA	NA	546.355	C28 H53 O7 N1 P1	B	M+H	2.09701e+07	2.51861e+07	2.03777e+07	3.90506e+07	6.4619e+07	5.09843e+07
1.09_590.346429333333	1.99052	0.00869148	1.09	LPC(20:3)	LPC(20:3)	M+HCOO	LPC	(20:3)	(20:3)	NA	NA	590.346	C29 H53 O9 N1 P1	A	M+H	2.04553e+06	2.36445e+06	2.05436e+06	3.69426e+06	5.11422e+06	4.05891e+06
0.98_544.339844	1.84805	0.0234853	0.98	LPC(20:4)	LPC(20:4)	M+H	LPC	(20:4)	(20:4)	NA	NA	544.34	C28 H51 O7 N1 P1	B	M+H	3.66518e+07	4.718e+07	5.16735e+07	8.16635e+07	8.63284e+07	8.24293e+07
1.02_502.2928785	0.987702	0.747911	1.02	LPE(20:4)	LPE(20:4)	M+H	LPE	(20:4)	(20:4)	NA	NA	502.293	C25 H45 O7 N1 P1	B	M+H	6.05909e+07	6.46922e+07	6.26418e+07	6.58378e+07	6.05202e+07	5.92559e+07
1.11_585.328417666667	0.96335	0.689609	1.11	MGMG(20:4)	MGMG(20:4)	M+HCOO	MGMG	(20:4)	(20:4)	NA	NA	585.328	C30 H49 O11	B	NA	2.70114e+07	2.73537e+07	2.25797e+07	2.76822e+07	2.38887e+07	2.25538e+07
1.7_303.232859	0.780797	0.405277	1.7	FA(20:4)	FA(20:4)	M-H	FA	(20:4)	(20:4)	NA	NA	303.233	O2 H31 C20	D	M-H	2737778643	2813470303	2112740417	9.99958e+08	2749561847	2234501873
0.89_500.277413333333	0.905559	0.541979	0.89	LPE(20:5)	LPE(20:5)	M+H	LPE	(20:5)	(20:5)	NA	NA	500.277	C25 H43 O7 N1 P1	B	M+H	1.13519e+08	129556843	152722567	1.3893e+08	8.93253e+07	130162822
0.95_583.312367833333	1.17768	0.464596	0.95	MGMG(20:5)	MGMG(20:5)	M+HCOO	MGMG	(20:5)	(20:5)	NA	NA	583.312	C30 H47 O11	B	NA	3.77323e+07	3.31296e+07	4.62171e+07	6.0208e+07	3.60078e+07	4.16664e+07
1.37_301.217371666667	1.25365	0.478152	1.37	FA(20:5)	FA(20:5)	M-H	FA	(20:5)	(20:5)	NA	NA	301.217	O2 H29 C20	D	M-H	3391650895	2221429904	2.7106e+07	1526157485	2258358183	3286317760
2.12_301.217372	0.800048	0.797411	2.12	FA(20:5)(rep)	FA(20:5)	M-H	FA	(20:5)	(20:5)	NA	NA	301.217	O2 H29 C20	D	M-H	3.4991e+08	6.15052e+07	4.43469e+08	2.8169e+08	4.51209e+07	357138335
2.19_639.3789835	0.825429	0.0534239	2.19	SQMG(22:0)	SQMG(22:0)	M-H	SQMG	(22:0)	(22:0)	NA	NA	639.378	C31 H59 O11 S1	D	NA	1.81188e+07	1.67852e+07	1.68265e+07	1.34965e+07	1.33704e+07	1.58328e+07
0.88_557.288540666667	0.880499	0.399066	0.88	LPG(22:5)	LPG(22:5)	M-H	LPG	(22:5)	(22:5)	NA	NA	557.288	C28 H46 O9 N0 P1	B	NA	6.622e+07	8.18913e+07	9.4306e+07	8.15492e+07	62109372	6.97897e+07
1.14_611.3438775	0.739163	0.0255829	1.14	MGMG(22:5)	MGMG(22:5)	M+HCOO	MGMG	(22:5)	(22:5)	NA	NA	611.344	C32 H51 O11	B	NA	5.64853e+06	5.65224e+06	5.54306e+06	4.56904e+06	3.84845e+06	4.03285e+06
1.79_329.248838	1.07107	0.997133	1.79	FA(22:5)	FA(22:5)	M-H	FA	(22:5)	(22:5)	NA	NA	329.249	O2 H33 C22	D	M-H	2.731e+07	2.23491e+07	2.28013e+07	1.35748e+07	3.01301e+07	3.39053e+07
2.6_653.394273166667	0.693148	0.0314168	2.6	SQMG(23:0)	SQMG(23:0)	M-H	SQMG	(23:0)	(23:0)	NA	NA	653.394	C32 H61 O11 S1	D	NA	1.93237e+06	1.85666e+06	1.63908e+06	1.10647e+06	1.17928e+06	1.47674e+06
2.96_667.410486333333	1.07721	0.20096	2.96	SQMG(24:0)	SQMG(24:0)	M-H	SQMG	(24:0)	(24:0)	NA	NA	667.41	C33 H63 O11 S1	D	NA	4.35494e+08	4.28419e+08	4.72944e+08	5.01372e+08	4.45419e+08	493284484
3.14_443.4095815	1.04597	0.499187	3.14	MG(24:0)	MG(24:0)	M+H	MG	(24:0)	(24:0)	NA	NA	443.409	C27 H55 O4	A	M+H	6.32205e+06	6.01584e+06	5.28861e+06	6.16046e+06	5.80922e+06	6.46717e+06
2.21_665.394490833333	0.72692	0.0208212	2.21	SQMG(24:1)	SQMG(24:1)	M-H	SQMG	(24:1)	(24:1)	NA	NA	665.394	C33 H61 O11 S1	D	NA	6.61467e+06	7.62924e+06	6.13027e+06	4.82603e+06	4.51814e+06	5.46623e+06
3.71_695.441386	1.51253	0.0338034	3.71	SQMG(26:0)	SQMG(26:0)	M-H	SQMG	(26:0)	(26:0)	NA	NA	695.441	C35 H67 O11 S1	D	NA	3.19482e+06	3.20201e+06	3.70105e+06	5.293e+06	4.18764e+06	5.79271e+06
3.19_693.425499833333	0.830028	0.121884	3.19	SQMG(26:1)	SQMG(26:1)	M-H	SQMG	(26:1)	(26:1)	NA	NA	693.425	C35 H65 O11 S1	D	NA	2.39647e+06	2.56531e+06	2.959e+06	2.21393e+06	1.91051e+06	2.45002e+06
10.3_871.4349185	1.32036	0.788579	10.3	PIP(29:0)	PIP(29:0)	M+Na	PIP	(29:0)	(29:0)	NA	NA	871.434	C38 H74 O16 N0 P2 Na1	C	NA	131713	180270	205904	39687.8	527426	116685
3.9_765.4836405	1.32583	0.268972	3.9	SQDG(30:0)	SQDG(30:0)	M-H	SQDG	(30:0)	(30:0)	NA	NA	765.483	C39 H73 O12 S1	C	NA	4.85487e+07	4.32674e+07	7.39927e+07	9.61342e+07	5.81145e+07	6.5586e+07
5.68_706.538483	1.52182	0.128293	5.68	PC(30:0)	PC(30:0)	M+H	PC	(30:0)	(30:0)	NA	NA	706.538	C38 H77 O8 N1 P1	C	M+H	2.247e+07	1.97615e+07	1.50416e+07	2.10197e+07	3.76661e+07	2.84735e+07
3.23_763.467876833333	1.46314	0.0129422	3.23	SQDG(30:1)	SQDG(30:1)	M-H	SQDG	(30:1)	(30:1)	NA	NA	763.467	C39 H71 O12 S1	C	NA	1.17659e+08	1.08479e+08	1.35041e+08	187893182	169238049	1.71327e+08
5.89_704.5248385	1.1947	0.748421	5.89	PC(30:1)(rep)	PC(30:1)	M+H	PC	(30:1)	(30:1)	NA	NA	704.522	C38 H75 O8 N1 P1	C	M+H	1.0089e+07	1.15146e+07	7.04762e+06	5.76843e+06	1.46475e+07	1.38135e+07
2.87_761.452253166667	1.07904	0.536134	2.87	SQDG(30:2)	SQDG(30:2)	M-H	SQDG	(30:2)	(30:2)	NA	NA	761.452	C39 H69 O12 S1	C	NA	3.74721e+07	4.92643e+07	5.51095e+07	5.02151e+07	4.76979e+07	5.51442e+07
2.35_759.435839166667	0.607614	0.00813413	2.35	SQDG(30:3)	SQDG(30:3)	M-H	SQDG	(30:3)	(30:3)	NA	NA	759.436	C39 H67 O12 S1	C	NA	2.21784e+06	1.90873e+06	2.48628e+06	1.2671e+06	1.25843e+06	1.49252e+06
1.55_627.440121	0.653811	0.374585	1.55	PEt(30:3e)	PEt(30:3e)	M-H	PEt	(30:3e)	(30:3e)	NA	NA	627.44	C35 H64 O7 N0 P1	C	NA	3.21372e+06	3.32616e+06	2.70621e+06	409422	2.75422e+06	2.88156e+06
4.38_779.499455666667	1.29788	0.113015	4.38	SQDG(31:0)	SQDG(31:0)	M-H	SQDG	(31:0)	(31:0)	NA	NA	779.498	C40 H75 O12 S1	C	NA	4.68537e+06	4.54686e+06	6.1264e+06	7.62412e+06	5.62397e+06	6.68563e+06
2.02_823.489046833333	1.09516	0.484616	2.02	SQDG(31:1)	SQDG(31:1)	M+HCOO	SQDG	(31:1)	(31:1)	NA	NA	823.488	C41 H75 O14 S1	C	NA	6.22266e+06	4.79677e+06	6.41956e+06	6.12125e+06	5.64199e+06	7.33531e+06
3.59_777.4837165	1.21876	0.113321	3.59	SQDG(31:1)(rep)	SQDG(31:1)	M-H	SQDG	(31:1)	(31:1)	NA	NA	777.483	C40 H73 O12 S1	C	NA	3.35454e+07	3.20018e+07	3.93455e+07	4.9011e+07	3.87015e+07	4.01262e+07
2.02_807.493914	0.659845	0.0736645	2.02	SQMG(31:2)	SQMG(31:2)	M+HCOO	SQMG	(31:2)	(31:2)	NA	NA	807.493	C41 H75 O13 S1	D	NA	4.63191e+06	3.01765e+06	4.22047e+06	2.36049e+06	2.6071e+06	2.8648e+06
3.09_775.468003833333	1.10065	0.714597	3.09	SQDG(31:2)	SQDG(31:2)	M-H	SQDG	(31:2)	(31:2)	NA	NA	775.467	C40 H71 O12 S1	C	NA	3.62161e+06	3.25106e+06	4.18403e+06	5.32773e+06	3.00422e+06	3.83755e+06
2.06_805.478717	0.623014	0.0549109	2.06	SQMG(31:3)	SQMG(31:3)	M+HCOO	SQMG	(31:3)	(31:3)	NA	NA	805.478	C41 H73 O13 S1	D	NA	5.79579e+06	5.18809e+06	5.85322e+06	4.44682e+06	3.13922e+06	2.9037e+06
7.4_734.569483666667	1.94021	0.0465467	7.4	PC(32:0)	PC(32:0)	M+H	PC	(32:0)	(32:0)	NA	NA	734.569	C40 H81 O8 N1 P1	C	M+H	1.07904e+07	8.90425e+06	7.41257e+06	1.25257e+07	2.31161e+07	1.69519e+07
4_791.499442166667	1.12521	0.737721	4	SQDG(32:1)	SQDG(32:1)	M-H	SQDG	(32:1)	(32:1)	NA	NA	791.498	C41 H75 O12 S1	C	NA	1721716749	1517998690	2812219027	3340727357	1791194005	1677759086
2.91_787.467063666667	1.64793	0.0457497	2.91	SQDG(32:3)	SQDG(32:3)	M-H	SQDG	(32:3)	(32:3)	NA	NA	787.467	C41 H71 O12 S1	C	NA	1.37957e+07	1.26918e+07	1.8047e+07	2.81919e+07	2.66853e+07	1.85124e+07
4.49_748.513565833333	0.850069	0.326227	4.49	PS(33:0)	PS(33:0)	M-H	PS	(33:0)	(33:0)	NA	NA	748.513	C39 H75 O10 N1 P1	C	M-H	2.31307e+07	1.91933e+07	2.57863e+07	2.42672e+07	1.64062e+07	1.72252e+07
4.49_805.514901	1.04625	0.743932	4.49	SQDG(33:1)	SQDG(33:1)	M-H	SQDG	(33:1)	(33:1)	NA	NA	805.514	C42 H77 O12 S1	C	NA	1.54439e+07	1.41347e+07	2.01219e+07	2.04465e+07	1.52032e+07	1.63492e+07
6.1_746.569587	1.20535	0.723097	6.1	PC(33:1)	PC(33:1)	M+H	PC	(33:1)	(33:1)	NA	NA	746.569	C41 H81 O8 N1 P1	C	M+H	1.78685e+07	1.74276e+07	5.3971e+06	7.12617e+06	2.30764e+07	1.88469e+07
6.94_746.569682333333	0.482332	0.542417	6.94	PC(33:1)(rep)	PC(33:1)	M+H	PC	(33:1)	(33:1)	NA	NA	746.569	C41 H81 O8 N1 P1	C	M+H	8.35162e+06	1113733265	5.99108e+08	9.01331e+06	1.09641e+07	8.10209e+08
3.81_803.4989815	0.94715	0.747329	3.81	SQDG(33:2)	SQDG(33:2)	M-H	SQDG	(33:2)	(33:2)	NA	NA	803.498	C42 H75 O12 S1	C	NA	2.49263e+06	2.17621e+06	3.1975e+06	2.59957e+06	2.25976e+06	2.59127e+06
4.86_744.554327	0.917695	0.735393	4.86	PC(33:2)	PC(33:2)	M+H	PC	(33:2)	(33:2)	NA	NA	744.554	C41 H79 O8 N1 P1	C	M+H	1.0988e+08	1.03676e+08	6.46256e+07	5.91422e+07	9.32512e+07	1.02893e+08
4.7_742.538685666667	1.5503	0.0732847	4.7	PC(33:3)	PC(33:3)	M+H	PC	(33:3)	(33:3)	NA	NA	742.538	C41 H77 O8 N1 P1	C	M+H	6.20341e+08	6.76439e+08	4.19324e+08	7.28504e+08	1024089023	9.07879e+08
2.96_799.467227166667	0.753333	0.058085	2.96	SQDG(33:4)	SQDG(33:4)	M-H	SQDG	(33:4)	(33:4)	NA	NA	799.467	C42 H71 O12 S1	C	NA	2.52018e+06	2.33652e+06	3.02064e+06	2.06263e+06	1.9165e+06	1.95513e+06
7.33_781.510112333333	3.21692	0.0437294	7.33	MGDG(33:4)	MGDG(33:4)	M+HCOO	MGDG	(33:4)	(33:4)	NA	NA	781.511	C43 H73 O12	D	NA	560637	510279	553716	1.24348e+06	2.66229e+06	1.32054e+06
1.39_937.516537333333	0.912948	0.651101	1.39	DGDG(33:7)	DGDG(33:7)	M+HCOO	DGDG	(33:7)	(33:7)	NA	NA	937.517	C49 H77 O17	D	NA	5.14245e+06	3.81222e+06	5.31839e+06	2.45593e+06	4.74435e+06	5.83029e+06
5.06_819.530613666667	1.14687	0.00966437	5.06	SQDG(34:1)	SQDG(34:1)	M-H	SQDG	(34:1)	(34:1)	NA	NA	819.53	C43 H79 O12 S1	C	NA	1.43915e+07	1.52231e+07	1.49072e+07	1.65328e+07	1.77752e+07	1.67529e+07
3.96_817.514715	0.642219	0.390578	3.96	SQDG(34:2)	SQDG(34:2)	M-H	SQDG	(34:2)	(34:2)	NA	NA	817.514	C43 H77 O12 S1	C	NA	9.70899e+07	158124087	1.73638e+08	1.46607e+07	1.14875e+08	1.45881e+08
3.45_815.498865166667	0.474536	0.0675038	3.45	SQDG(34:3)	SQDG(34:3)	M-H	SQDG	(34:3)	(34:3)	NA	NA	815.498	C43 H75 O12 S1	C	NA	2.50922e+08	2.38436e+08	4.1007e+08	2.17613e+08	1.0876e+08	1.00438e+08
5.55_756.553932166667	0.872122	0.509338	5.55	PC(34:3)(rep)	PC(34:3)	M+H	PC	(34:3)	(34:3)	NA	NA	756.554	C42 H79 O8 N1 P1	C	M+H	8.17088e+07	1.27151e+08	1.12932e+08	9.28994e+07	1.16176e+08	7.15663e+07
3.24_813.483364833333	0.807734	0.289403	3.24	SQDG(34:4)	SQDG(34:4)	M-H	SQDG	(34:4)	(34:4)	NA	NA	813.483	C43 H73 O12 S1	C	NA	9.65602e+07	1.29812e+08	1.55386e+08	1.07974e+08	1.10131e+08	9.02545e+07
3.99_859.488077666667	1.23003	0.841387	3.99	SQDG(34:4)(rep)	SQDG(34:4)	M+HCOO	SQDG	(34:4)	(34:4)	NA	NA	859.488	C44 H75 O14 S1	C	NA	1.09128e+07	8.81782e+06	3.35321e+07	4.46351e+07	1.00508e+07	1.08288e+07
2.85_811.467970666667	1.15925	0.16086	2.85	SQDG(34:5)	SQDG(34:5)	M-H	SQDG	(34:5)	(34:5)	NA	NA	811.467	C43 H71 O12 S1	C	NA	8.17466e+07	7.56961e+07	9.67436e+07	101854009	9.06145e+07	1.02196e+08
1.53_677.4558095	1.03193	0.738036	1.53	PEt(34:6e)	PEt(34:6e)	M-H	PEt	(34:6e)	(34:6e)	NA	NA	677.455	C39 H66 O7 N0 P1	C	NA	7.1413e+06	7.33722e+06	4.29981e+06	1.298e+06	8.34989e+06	9.73e+06
4.64_774.5295005	0.825742	0.531402	4.64	PS(35:1)	PS(35:1)	M-H	PS	(35:1)	(35:1)	NA	NA	774.529	C41 H77 O10 N1 P1	C	M-H	3.98904e+07	29729880	5.92975e+07	5.02321e+07	2.91011e+07	2.71197e+07
4.05_772.513861666667	0.772529	0.292671	4.05	PS(35:2)	PS(35:2)	M-H	PS	(35:2)	(35:2)	NA	NA	772.513	C41 H75 O10 N1 P1	C	M-H	3.45718e+07	2.79106e+07	4.57939e+07	3.77411e+07	2.28109e+07	2.30945e+07
3.5_770.497887833333	0.765081	0.598637	3.5	PS(35:3)	PS(35:3)	M-H	PS	(35:3)	(35:3)	NA	NA	770.498	C41 H73 O10 N1 P1	C	M-H	8.41635e+06	1.67324e+07	2.38164e+07	1.5057e+07	9.85493e+06	1.25504e+07
3.63_827.499275666667	0.959189	0.71498	3.63	SQDG(35:4)	SQDG(35:4)	M-H	SQDG	(35:4)	(35:4)	NA	NA	827.498	C44 H75 O12 S1	C	NA	4.03766e+06	5.07446e+06	5.22271e+06	5.01541e+06	4.36256e+06	4.37184e+06
3.15_825.483284666667	1.12519	0.544964	3.15	SQDG(35:5)	SQDG(35:5)	M-H	SQDG	(35:5)	(35:5)	NA	NA	825.483	C44 H73 O12 S1	C	NA	1.58893e+06	1.92355e+06	3.02424e+06	2.92838e+06	2.31061e+06	2.11606e+06
4.47_843.5300765	0.678483	0.10661	4.47	SQDG(36:3)	SQDG(36:3)	M-H	SQDG	(36:3)	(36:3)	NA	NA	843.53	C45 H79 O12 S1	C	NA	1.02412e+07	1.10995e+07	1.46879e+07	1.06269e+07	7.46046e+06	6.35746e+06
6.39_784.585294833333	1.19939	0.435018	6.39	PC(36:3)	PC(36:3)	M+H	PC	(36:3)	(36:3)	NA	NA	784.585	C44 H83 O8 N1 P1	C	M+H	6.33817e+06	5.38512e+06	8.7575e+06	9.86145e+06	8.74025e+06	5.96269e+06
4.04_841.514405833333	1.10826	0.744753	4.04	SQDG(36:4)	SQDG(36:4)	M-H	SQDG	(36:4)	(36:4)	NA	NA	841.514	C45 H77 O12 S1	C	NA	4.92877e+07	5.07848e+07	7.75874e+07	8.77003e+07	6.5038e+07	4.41545e+07
3.49_839.498772333333	1.06088	0.711621	3.49	SQDG(36:5)	SQDG(36:5)	M-H	SQDG	(36:5)	(36:5)	NA	NA	839.498	C45 H75 O12 S1	C	NA	9.95327e+07	8.74661e+07	1.37278e+08	1.38875e+08	1.02642e+08	1.02502e+08
2.94_837.483163666667	0.836389	0.184397	2.94	SQDG(36:6)	SQDG(36:6)	M-H	SQDG	(36:6)	(36:6)	NA	NA	837.483	C45 H73 O12 S1	C	NA	4.02266e+06	4.93673e+06	5.29506e+06	3.43737e+06	4.40633e+06	4.07857e+06
7.39_804.576153166667	1.5752	0.101485	7.39	PS(37:0)	PS(37:0)	M-H	PS	(37:0)	(37:0)	NA	NA	804.576	C43 H83 O10 N1 P1	C	M-H	3.05767e+06	2.78744e+06	4.77524e+06	7.11237e+06	5.18748e+06	4.42928e+06
5.91_802.5610995	1.16658	0.281911	5.91	PS(37:1)	PS(37:1)	M-H	PS	(37:1)	(37:1)	NA	NA	802.56	C43 H81 O10 N1 P1	C	M-H	9.26451e+06	7.73345e+06	8.9881e+06	1.19475e+07	9.88522e+06	8.48223e+06
4.08_825.478482	1.00623	0.990556	4.08	MGDG(37:10)	MGDG(37:10)	M+HCOO	MGDG	(37:10)	(37:10)	NA	NA	825.479	C47 H69 O12	D	NA	1.38678e+07	1.58253e+07	2.45449e+07	2.58375e+07	1.45591e+07	1.41792e+07
8.94_744.592308833333	0.587769	0.289597	8.94	PE(37:1p)	PE(37:1p)	M+H	PE	(37:1p)	(37:1p)	NA	NA	744.59	C42 H83 O7 N1 P1	D	M+H	9.36467e+06	1.10917e+07	5.46425e+06	1.68211e+06	7.29457e+06	6.25862e+06
4.3_811.5454555	1.14874	0.351869	4.3	PG(37:2)	PG(37:2)	M+Na	PG	(37:2)	(37:2)	NA	NA	811.546	C43 H81 O10 N0 P1 Na1	C	M+NH4	1504160616	1297533331	1538404566	2020151649	1535151690	1430330650
4.9_800.544799333333	1.05627	0.64889	4.9	PS(37:2)	PS(37:2)	M-H	PS	(37:2)	(37:2)	NA	NA	800.545	C43 H79 O10 N1 P1	C	M-H	7.22369e+06	5.6191e+06	7.51759e+06	7.84845e+06	7.47838e+06	6.17919e+06
3.66_809.529834333333	1.06386	0.453479	3.66	PG(37:3)	PG(37:3)	M+Na	PG	(37:3)	(37:3)	NA	NA	809.53	C43 H79 O10 N0 P1 Na1	C	M+NH4	2.26033e+08	1.86946e+08	1.88474e+08	226509601	1.95382e+08	2.17968e+08
4.29_798.529358	0.83822	0.603865	4.29	PS(37:3)	PS(37:3)	M-H	PS	(37:3)	(37:3)	NA	NA	798.529	C43 H77 O10 N1 P1	C	M-H	2.96675e+07	2.57973e+07	1.39742e+07	2.91207e+07	1.44845e+07	1.46e+07
3.73_796.514105333333	0.77673	0.0313663	3.73	PS(37:4)	PS(37:4)	M-H	PS	(37:4)	(37:4)	NA	NA	796.513	C43 H75 O10 N1 P1	C	M-H	2.03338e+07	1.77478e+07	2.01904e+07	1.66253e+07	1.34895e+07	1.51469e+07
4.71_717.451214	0.751463	0.279761	4.71	PMe(37:7)	PMe(37:7)	M-H	PMe	(37:7)	(37:7)	NA	NA	717.45	C41 H66 O8 N0 P1	C	NA	7.49499e+06	6.08427e+06	8.07121e+06	7.78844e+06	3.56848e+06	4.91261e+06
4.71_777.472462666667	0.849701	0.504523	4.71	PG(37:7)	PG(37:7)	M-H	PG	(37:7)	(37:7)	NA	NA	777.471	C43 H70 O10 N0 P1	C	M+NH4	2.40785e+07	1.87466e+07	3.1599e+07	2.94595e+07	1.76421e+07	1.61366e+07
4.09_715.435579166667	0.915991	0.64991	4.09	PMe(37:8)	PMe(37:8)	M-H	PMe	(37:8)	(37:8)	NA	NA	715.434	C41 H64 O8 N0 P1	C	NA	4.01825e+06	3.1596e+06	4.68314e+06	3.83567e+06	2.49438e+06	4.53451e+06
5_827.494469333333	1.21587	0.130743	5	MGDG(37:9)	MGDG(37:9)	M+HCOO	MGDG	(37:9)	(37:9)	NA	NA	827.495	C47 H71 O12	D	NA	8.87701e+06	8.41033e+06	8.39757e+06	1.20969e+07	9.46293e+06	9.66975e+06
8.11_877.609143333333	0.78118	0.427409	8.11	SQDG(38:0)	SQDG(38:0)	M-H	SQDG	(38:0)	(38:0)	NA	NA	877.608	C47 H89 O12 S1	C	NA	3.92885e+06	2.53926e+06	5.19928e+06	3.3864e+06	2.32573e+06	3.4022e+06
7.73_810.600682166667	1.22526	0.537891	7.73	PC(38:4)	PC(38:4)	M+H	PC	(38:4)	(38:4)	NA	NA	810.601	C46 H85 O8 N1 P1	C	M+H	7.74944e+06	6.19455e+06	1.26626e+07	1.47967e+07	1.07948e+07	7.00851e+06
5.61_806.569505	1.88433	0.000340483	5.61	PC(38:6)(rep)	PC(38:6)	M+H	PC	(38:6)	(38:6)	NA	NA	806.569	C46 H81 O8 N1 P1	C	M+H	1.80346e+07	1.85867e+07	2.05328e+07	3.41059e+07	3.87558e+07	3.48355e+07
5.08_853.5093835	1.55012	0.0261653	5.08	MGDG(39:10)	MGDG(39:10)	M+HCOO	MGDG	(39:10)	(39:10)	NA	NA	853.511	C49 H73 O12	D	NA	3.79548e+06	4.03969e+06	3.64016e+06	5.84004e+06	6.8488e+06	5.09933e+06
5.84_826.5606415	1.31483	0.321496	5.84	PS(39:3)	PS(39:3)	M-H	PS	(39:3)	(39:3)	NA	NA	826.56	C45 H81 O10 N1 P1	C	M-H	8.56827e+06	9.38085e+06	1.16635e+07	1.42067e+07	1.60472e+07	8.6818e+06
4.69_824.545357166667	0.998827	0.945365	4.69	PS(39:4)	PS(39:4)	M-H	PS	(39:4)	(39:4)	NA	NA	824.545	C45 H79 O10 N1 P1	C	M-H	1.70648e+07	1.61474e+07	2.64149e+07	2.70078e+07	1.95061e+07	1.30433e+07
4.63_801.471877333333	1.54124	0.0628148	4.63	PG(39:9)	PG(39:9)	M-H	PG	(39:9)	(39:9)	NA	NA	801.471	C45 H70 O10 N0 P1	C	M+NH4	5.65349e+06	4.70899e+06	6.86397e+06	1.06607e+07	8.97667e+06	6.91266e+06
8.42_905.6400675	0.813391	0.533291	8.42	SQDG(40:0)	SQDG(40:0)	M-H	SQDG	(40:0)	(40:0)	NA	NA	905.639	C49 H93 O12 S1	C	NA	7.82034e+06	4.51897e+06	9.32202e+06	6.42685e+06	4.07489e+06	7.11738e+06
8.15_903.624957833333	0.830668	0.173495	8.15	SQDG(40:1)	SQDG(40:1)	M-H	SQDG	(40:1)	(40:1)	NA	NA	903.624	C49 H91 O12 S1	C	NA	1.12885e+07	9.03229e+06	1.2166e+07	9.79162e+06	8.17691e+06	9.01721e+06
7.96_901.608568666667	0.980054	0.87545	7.96	SQDG(40:2)	SQDG(40:2)	M-H	SQDG	(40:2)	(40:2)	NA	NA	901.608	C49 H89 O12 S1	C	NA	5.07232e+06	4.30386e+06	6.35867e+06	6.80138e+06	4.08616e+06	4.53347e+06
5.91_796.584952666667	0.999655	0.990202	5.91	PE(40:4)	PE(40:4)	M+H	PE	(40:4)	(40:4)	NA	NA	796.585	C45 H83 O8 N1 P1	C	M+H	1.69212e+07	2.25256e+07	1.27891e+07	1.27905e+07	2.17476e+07	1.76798e+07
1.7_607.473443833333	0.831334	0.531821	1.7	OAHFA(40:7)	OAHFA(40:7)	M-H	OAHFA	(40:7)	(40:7)	NA	NA	607.473	C40 H63 O4	C	NA	5.95979e+07	5.19724e+07	4.04864e+07	1.52464e+07	5.76175e+07	5.3546e+07
3.84_796.524666333333	1.07985	0.573182	3.84	PE(40:7p)	PE(40:7p)	M+Na	PE	(40:7p)	(40:7p)	NA	NA	796.525	C45 H76 O7 N1 P1 Na1	D	M+H	3.34673e+07	3.46988e+07	2.34714e+07	2.90985e+07	3.55332e+07	3.43226e+07
1.55_605.457603166667	0.544699	0.30727	1.55	OAHFA(40:8)	OAHFA(40:8)	M-H	OAHFA	(40:8)	(40:8)	NA	NA	605.458	C40 H61 O4	C	NA	2.54139e+06	2.86397e+06	1.67033e+06	230404	1.56382e+06	2.05989e+06
4.74_827.487527666667	1.1029	0.744269	4.74	PG(41:10)	PG(41:10)	M-H	PG	(41:10)	(41:10)	NA	NA	827.487	C47 H72 O10 N0 P1	C	M+NH4	9.7234e+06	1.02775e+07	1.31614e+07	1.63622e+07	1.15074e+07	8.70495e+06
4.07_825.471885666667	1.02946	0.932912	4.07	PG(41:11)	PG(41:11)	M-H	PG	(41:11)	(41:11)	NA	NA	825.471	C47 H70 O10 N0 P1	C	M+NH4	1.46194e+07	1.32286e+07	1.775e+07	2.20752e+07	1.56409e+07	9.2254e+06
4.76_877.5100465	1.68962	0.124111	4.76	MGDG(41:12)	MGDG(41:12)	M+HCOO	MGDG	(41:12)	(41:12)	NA	NA	877.511	C51 H73 O12	D	NA	1.33117e+06	1.55571e+06	2.07335e+06	3.19026e+06	3.41813e+06	1.7725e+06
4.57_880.599838833333	1.33013	0.211616	4.57	PS(41:2)	PS(41:2)	M+Na	PS	(41:2)	(41:2)	NA	NA	880.604	C47 H88 O10 N1 P1 Na1	C	M-H	7.90066e+07	8.50227e+07	52185955	7.52509e+07	1.14593e+08	9.77503e+07
8.63_798.639957666667	0.665577	0.410573	8.63	PE(41:2p)	PE(41:2p)	M+H	PE	(41:2p)	(41:2p)	NA	NA	798.637	C46 H89 O7 N1 P1	D	M+H	9.92774e+07	1.55262e+08	6.04902e+07	2.14591e+07	8.04727e+07	1.07744e+08
5.31_812.555495333333	0.61828	0.0516978	5.31	PE(41:6p)	PE(41:6p)	M+Na	PE	(41:6p)	(41:6p)	NA	NA	812.556	C46 H80 O7 N1 P1 Na1	D	M+H	6.43929e+07	5.96957e+07	5.45517e+07	2.78989e+07	3.93956e+07	4.31552e+07
3.78_846.529397666667	0.873897	0.256831	3.78	PS(41:7)	PS(41:7)	M-H	PS	(41:7)	(41:7)	NA	NA	846.529	C47 H77 O10 N1 P1	C	M-H	7.1996e+06	7.2799e+06	8.34326e+06	7.88244e+06	6.04763e+06	6.01467e+06
4.29_810.539769666667	1.12192	0.431091	4.29	PE(41:7p)	PE(41:7p)	M+Na	PE	(41:7p)	(41:7p)	NA	NA	810.541	C46 H78 O7 N1 P1 Na1	D	M+H	3346230009	2872890280	3390499819	4359499699	3334281037	3087445150
3.55_808.524221333333	1.097	0.352877	3.55	PE(41:8p)	PE(41:8p)	M+Na	PE	(41:8p)	(41:8p)	NA	NA	808.525	C46 H76 O7 N1 P1 Na1	D	M+H	9.34068e+07	8.29688e+07	7.10413e+07	8.41316e+07	9.11562e+07	9.61274e+07
1.7_629.4552035	0.914271	0.625659	1.7	OAHFA(42:10)	OAHFA(42:10)	M-H	OAHFA	(42:10)	(42:10)	NA	NA	629.458	C42 H61 O4	C	NA	3.80955e+07	3.51726e+07	3.7724e+07	1.11104e+07	4.51432e+07	4.52233e+07
4.49_854.569761166667	1.62156	0.0706603	4.49	PC(42:10)	PC(42:10)	M+H	PC	(42:10)	(42:10)	NA	NA	854.569	C50 H81 O8 N1 P1	C	M+H	1.68375e+07	1.81019e+07	1.46206e+07	2.09667e+07	3.4611e+07	2.4787e+07
5.18_894.6180165	1.03276	0.844092	5.18	PS(42:2)	PS(42:2)	M+Na	PS	(42:2)	(42:2)	NA	NA	894.619	C48 H90 O10 N1 P1 Na1	C	M-H	1.10143e+07	1.20438e+07	7.44813e+06	8.30235e+06	1.23538e+07	1.08495e+07
8.21_929.6397135	1.09767	0.305228	8.21	SQDG(42:2)	SQDG(42:2)	M-H	SQDG	(42:2)	(42:2)	NA	NA	929.639	C51 H93 O12 S1	C	NA	1.82205e+06	1.68776e+06	1.9976e+06	2.0316e+06	2.21563e+06	1.7981e+06
8.25_828.648136333333	0.628292	0.367418	8.25	PE(42:2)	PE(42:2)	M+H	PE	(42:2)	(42:2)	NA	NA	828.648	C47 H91 O8 N1 P1	D	M+H	5.70616e+06	6.68602e+06	2.43388e+06	1.30924e+06	3.74508e+06	4.26079e+06
9.51_812.655517333333	0.575089	0.287169	9.51	PE(42:2p)	PE(42:2p)	M+H	PE	(42:2p)	(42:2p)	NA	NA	812.653	C47 H91 O7 N1 P1	D	M+H	252455338	328321939	1.59278e+08	4.39222e+07	1.88577e+08	1.93098e+08
8.07_927.624717166667	0.779293	0.0353452	8.07	SQDG(42:3)	SQDG(42:3)	M-H	SQDG	(42:3)	(42:3)	NA	NA	927.624	C51 H91 O12 S1	C	NA	1.39173e+07	1.32894e+07	1.36587e+07	1.14048e+07	1.08945e+07	9.54691e+06
7.85_925.6091435	0.739852	0.0541484	7.85	SQDG(42:4)	SQDG(42:4)	M-H	SQDG	(42:4)	(42:4)	NA	NA	925.608	C51 H89 O12 S1	C	NA	3.52212e+07	3.6781e+07	4.64161e+07	3.17272e+07	2.88343e+07	2.70504e+07
7_923.593224333333	1.4619	0.203654	7	SQDG(42:5)	SQDG(42:5)	M-H	SQDG	(42:5)	(42:5)	NA	NA	923.592	C51 H87 O12 S1	C	NA	3.61395e+06	2.91647e+06	6.35922e+06	7.69563e+06	5.88697e+06	5.26072e+06
4.86_824.555827	0.877106	0.537705	4.86	PE(42:7p)	PE(42:7p)	M+Na	PE	(42:7p)	(42:7p)	NA	NA	824.556	C47 H80 O7 N1 P1 Na1	D	M+H	3.16178e+07	3.14171e+07	2.1394e+07	1.75384e+07	2.64894e+07	3.00254e+07
5.88_908.631408833333	1.02035	0.876403	5.88	PS(43:2)	PS(43:2)	M+Na	PS	(43:2)	(43:2)	NA	NA	908.635	C49 H92 O10 N1 P1 Na1	C	M-H	2.77002e+08	308725644	182838333	2.11031e+08	3.08394e+08	2.64784e+08
6.98_842.664160666667	0.632492	0.267261	6.98	PE(43:2)	PE(43:2)	M+H	PE	(43:2)	(43:2)	NA	NA	842.663	C48 H93 O8 N1 P1	D	M+H	1.59153e+07	1.26898e+07	9.59445e+06	3.48072e+06	9.08205e+06	1.15982e+07
4.72_906.615519833333	0.934029	0.710183	4.72	PS(43:3)	PS(43:3)	M+Na	PS	(43:3)	(43:3)	NA	NA	906.619	C49 H90 O10 N1 P1 Na1	C	M-H	476128937	4.48007e+08	3.19303e+08	3.3611e+08	4.55189e+08	3.70108e+08
8.64_826.669573833333	0.598502	0.0794749	8.64	PE(43:3e)	PE(43:3e)	M+H	PE	(43:3e)	(43:3e)	NA	NA	826.668	C48 H93 O7 N1 P1	D	M+H	3.27553e+07	2.91956e+07	3.17759e+07	1.30149e+07	2.16136e+07	2.14672e+07
3.96_904.599749333333	0.958892	0.766756	3.96	PS(43:4)	PS(43:4)	M+Na	PS	(43:4)	(43:4)	NA	NA	904.604	C49 H88 O10 N1 P1 Na1	C	M-H	6.742e+07	6.73084e+07	5.11071e+07	4.76458e+07	6.41352e+07	6.64152e+07
8_939.6245305	0.698236	0.0506839	8	SQDG(43:4)	SQDG(43:4)	M-H	SQDG	(43:4)	(43:4)	NA	NA	939.624	C52 H91 O12 S1	C	NA	4.7392e+06	4.52947e+06	6.17988e+06	4.20995e+06	3.36877e+06	3.20802e+06
7.77_937.609043833333	0.702718	0.0185065	7.77	SQDG(43:5)	SQDG(43:5)	M-H	SQDG	(43:5)	(43:5)	NA	NA	937.608	C52 H89 O12 S1	C	NA	1.33464e+06	1.24825e+06	1.55699e+06	1.01678e+06	911726	980654
5.47_838.571129166667	1.22487	0.33411	5.47	PE(43:7p)	PE(43:7p)	M+Na	PE	(43:7p)	(43:7p)	NA	NA	838.572	C48 H82 O7 N1 P1 Na1	D	M+H	1.3032e+07	1.36389e+07	8.83648e+06	1.12344e+07	1.72606e+07	1.49968e+07
1.53_655.4741575	0.938712	0.669581	1.53	OAHFA(44:11)	OAHFA(44:11)	M-H	OAHFA	(44:11)	(44:11)	NA	NA	655.473	C44 H63 O4	C	NA	9.42837e+06	1.08983e+07	5.30209e+06	1.6649e+06	9.91516e+06	1.24779e+07
8.24_856.6796755	1.02919	0.890141	8.24	PE(44:2)	PE(44:2)	M+H	PE	(44:2)	(44:2)	NA	NA	856.679	C49 H95 O8 N1 P1	D	M+H	8.69459e+06	6.3881e+06	5.17708e+06	3.06101e+06	8.29422e+06	9.49599e+06
9.51_840.6869325	0.654425	0.208802	9.51	PE(44:2p)	PE(44:2p)	M+H	PE	(44:2p)	(44:2p)	NA	NA	840.684	C49 H95 O7 N1 P1	D	M+H	8.7433e+07	7.6792e+07	7.17985e+07	2.83367e+07	5.81827e+07	6.79403e+07
8.14_953.6404675	1.14557	0.386246	8.14	SQDG(44:4)	SQDG(44:4)	M-H	SQDG	(44:4)	(44:4)	NA	NA	953.639	C53 H93 O12 S1	C	NA	1.63645e+08	1.53039e+08	1.92033e+08	2.15141e+08	2.1365e+08	1.53981e+08
7.93_951.624778166667	1.50025	0.40081	7.93	SQDG(44:5)	SQDG(44:5)	M-H	SQDG	(44:5)	(44:5)	NA	NA	951.624	C53 H91 O12 S1	C	NA	1.35639e+08	1.429e+07	2.04671e+08	1.95686e+08	1.53007e+08	1.83295e+08
7.24_949.609475333333	1.10604	0.145499	7.24	SQDG(44:6)	SQDG(44:6)	M-H	SQDG	(44:6)	(44:6)	NA	NA	949.608	C53 H89 O12 S1	C	NA	8.12336e+06	7.67678e+06	8.67371e+06	9.00716e+06	8.36952e+06	9.69238e+06
8.45_981.670934	1.67264	0.0102299	8.45	SQDG(46:4)	SQDG(46:4)	M-H	SQDG	(46:4)	(46:4)	NA	NA	981.671	C55 H97 O12 S1	C	NA	1.25237e+06	1.38746e+06	1.58522e+06	2.32488e+06	2.71532e+06	2.02679e+06
8.24_979.655409	1.37011	0.0103904	8.24	SQDG(46:5)	SQDG(46:5)	M-H	SQDG	(46:5)	(46:5)	NA	NA	979.655	C55 H95 O12 S1	C	NA	2.12786e+06	2.20311e+06	2.51057e+06	3.21144e+06	2.94826e+06	3.21399e+06
4.72_956.631102666667	0.732531	0.241065	4.72	PS(47:6)	PS(47:6)	M+Na	PS	(47:6)	(47:6)	NA	NA	956.635	C53 H92 O10 N1 P1 Na1	C	M-H	6.87837e+07	7.92911e+07	4.75945e+07	3.65071e+07	6.52867e+07	4.15399e+07
3.98_954.615298166667	0.744649	0.174165	3.98	PS(47:7)	PS(47:7)	M+Na	PS	(47:7)	(47:7)	NA	NA	954.619	C53 H90 O10 N1 P1 Na1	C	M-H	3.38227e+08	3.65914e+08	2.43641e+08	1.83288e+08	2.86495e+08	2.35982e+08
4_982.6500805	0.720549	0.236045	4	PS(49:7)	PS(49:7)	M+Na	PS	(49:7)	(49:7)	NA	NA	982.651	C55 H94 O10 N1 P1 Na1	C	M-H	1.8158e+07	2.67373e+07	3.0835e+07	2.45573e+07	1.69009e+07	1.31093e+07
5.9_1303.7193215	1.18381	0.221429	5.9	PIP2(57:8)	PIP2(57:8)	M-H	PIP2	(57:8)	(57:8)	NA	NA	1303.72	C66 H114 O19 N0 P3	C	NA	3.30803e+06	3.01798e+06	3.64891e+06	4.69716e+06	3.57311e+06	3.53808e+06
8.4_1068.73915566667	0.521175	0.0737451	8.4	PE(59:12)	PE(59:12)	M+Na	PE	(59:12)	(59:12)	NA	NA	1068.74	C64 H104 O8 N1 P1 Na1	D	M+H	3.75133e+06	3.59836e+06	1.9749e+06	1.27116e+06	1.96531e+06	1.62327e+06
8.67_1096.770298	0.764703	0.447168	8.67	PE(61:12)	PE(61:12)	M+Na	PE	(61:12)	(61:12)	NA	NA	1096.77	C66 H108 O8 N1 P1 Na1	D	M+H	3.66368e+07	4.46238e+07	2.18578e+07	1.43528e+07	3.54791e+07	2.9023e+07
8.46_1094.75476016667	0.986321	0.899939	8.46	PE(61:13)	PE(61:13)	M+Na	PE	(61:13)	(61:13)	NA	NA	1094.75	C66 H106 O8 N1 P1 Na1	D	M+H	3.30344e+07	3.14275e+07	2.24279e+07	1.94462e+07	3.32333e+07	3.30217e+07
5.28_724.572344166667	1.01123	0.90602	5.28	CerG1(d36:3)	CerG1(d36:3)	M+H	CerG1	(d36:3)	(d36:3)	NA	NA	724.572	C42 H78 O8 N1	C	M+H	1.07872e+07	1.07173e+07	8.26216e+06	8.85664e+06	1.12102e+07	1.00341e+07
8.56_787.668807833333	0.575839	0.000582085	8.56	SM(d40:1)	SM(d40:1)	M+H	SM	(d40:1)	(d40:1)	NA	NA	787.669	C45 H92 O6 N2 P1	C	M+H	9.16886e+06	8.28633e+06	8.07432e+06	5.05081e+06	4.51966e+06	5.13041e+06
9.51_795.629366	0.576625	0.29719	9.51	Co(Q9)	Co(Q9)	M+H	Co	(Q9)	(Q9)	NA	NA	795.629	C54 H83 O4	A	NA	4.67e+07	5.97601e+07	2.83899e+07	7.64073e+06	3.44595e+07	3.56577e+07
